# Supplementary material
Source: PubMed Central journal article supplement (PMC4979614)
Supplement: NIHMS798567-supplement-Supplemental_Material.pdf [file NIHMS798567-supplement-Supplemental_Material.pdf]

## Supplemental Material

### Table of Contents

|                                                                                                                                                                                                                                                                                            |           |
|--------------------------------------------------------------------------------------------------------------------------------------------------------------------------------------------------------------------------------------------------------------------------------------------|-----------|
| <b>Supplemental Methods</b> .....                                                                                                                                                                                                                                                          | <b>2</b>  |
| Supplemental Methods .....                                                                                                                                                                                                                                                                 | 2         |
| Multiple Imputation Details and R Code .....                                                                                                                                                                                                                                               | 5         |
| <b>Supplemental Figures</b> .....                                                                                                                                                                                                                                                          | <b>8</b>  |
| Supplemental Figure 1. Worldwide crude prevalence of hypertension in adults 20 years and older by country in 2010 (upper) and 2000 (lower) .....                                                                                                                                           | 8         |
| Supplemental Figure 2. Worldwide age- and sex-standardized prevalence of hypertension in adults 20 years and older by country in 2010 (upper) and 2000 (lower), countries with imputed data left blank .....                                                                               | 9         |
| <b>Supplemental Tables</b> .....                                                                                                                                                                                                                                                           | <b>10</b> |
| Supplemental Table 1. Characteristics of included studies for 2010 hypertension prevalence by world region .....                                                                                                                                                                           | 10        |
| Supplemental Table 2. Characteristics of included studies for 2000 hypertension prevalence by world region .....                                                                                                                                                                           | 15        |
| Supplemental Table 3. Gender-specific hypertension awareness, treatment, and control in 2010 in countries with data by world region .....                                                                                                                                                  | 19        |
| Supplemental Table 4. Gender-specific hypertension awareness, treatment, and control in 2000 in countries with data by world region .....                                                                                                                                                  | 22        |
| Supplemental Table 5. Total population, hypertension prevalence estimates, and data sources by country in 2010 .....                                                                                                                                                                       | 24        |
| Supplemental Table 6. Total population, hypertension prevalence estimates, and data sources by country in 2000 .....                                                                                                                                                                       | 33        |
| Supplemental Table 7. Age-specific and age-adjusted prevalence estimates and absolute numbers of men and women with hypertension in 2010 by world region .....                                                                                                                             | 43        |
| Supplemental Table 8. Age-specific and age-adjusted prevalence estimates and absolute numbers of men and women with hypertension in 2000 by world region .....                                                                                                                             | 46        |
| Supplemental Table 9. Sensitivity analysis of age-standardized prevalence estimates and absolute numbers of men and women with hypertension worldwide and in high-income and low- and middle-income countries in 2000 and 2010 using only countries with data for both 2000 and 2010 ..... | 49        |
| <b>Supplemental References</b> .....                                                                                                                                                                                                                                                       | <b>50</b> |

## Supplemental Methods

### Study Selection

A search of MEDLINE was conducted using the medical subject headings “hypertension” or “blood pressure” or keywords “hypertension awareness” or “hypertension treatment” or “hypertension control” and the medical subject headings “prevalence” or “cross-sectional studies” to identify population-based studies reporting hypertension prevalence, awareness, treatment, and control. The search was limited to studies conducted in humans and published from January 1<sup>st</sup>, 1995 to December 31<sup>st</sup>, 2014. Additional studies were identified by manual review of references cited in reviews, meta-analyses, and original studies, including the previously reported pooling analysis of the global burden of hypertension in 2000.<sup>1</sup> Country-specific searches of the World Health Organization Global Infobase were also conducted.<sup>2</sup> Publications in other languages were translated into English. Eligibility criteria for inclusion were: (1) population-based cross-sectional survey in which sex-specific prevalence of hypertension (or data to calculate it) was reported; (2) blood pressure measurement methods were standardized; and (3) hypertension was defined as average systolic blood pressure 140 mm Hg or greater, average diastolic blood pressure 90 mm Hg or greater, and/or use of antihypertensive medication.

Literature searches, study selection, and data abstraction were conducted independently and in duplicate by three investigators (KTM, JDB, JER) with a standardized protocol and data-collection form, and discrepancies were resolved by consensus. The prevalence of prehypertension, defined as blood pressure between 120/80 mm Hg and 140/90 mm Hg, was also abstracted but was reported by so few publications that it was not included in the analyses. If no peer-reviewed studies were available for a country, government reports were used if the following blood pressure measurement requirements were met: (1) patients were required to rest at least 5 minutes before blood pressure measurements; (2) at least two blood pressure measurements were taken; and (3) blood pressure monitoring devices were validated according to either British Hypertension Society or European Hypertension Society protocols.<sup>3,4</sup> If nationally representative studies were available, they were used; otherwise, data from multisite or regional studies were used. If multiple regional or multisite studies were available for a given country (India, Ethiopia, and Brazil in 2010 and India, Cameroon, and Brazil in 2000), gender-specific random effects meta-regression models were used to estimate the association between the median age for each age category from the available publications and hypertension prevalence in each country, and then median age values in each age category of interest were used to calculate age- and gender-specific prevalence estimates for each country. Study authors were contacted to request additional information if necessary. We calculated age- and sex-specific prevalence of hypertension in the US population using data from the National Health and Nutrition Examination Survey (NHANES) 2007-2012,<sup>5</sup> in Ghana, India, Mexico, Russia, and South Africa using data from the World Health Organization’s Study on global AGEing and adult health (SAGE),<sup>6</sup> and in Argentina and Uruguay using data from the CESCAS I study.<sup>7</sup> Studies were included in the 2010 hypertension analysis if data collection took place in 2005 or later. Studies with data collection from 1995 to 2004 were used in the 2000 hypertension analysis. A total of 131 reports (135 studies) from 90 countries were included in the analyses (Supplemental Figure 1).

Proportions of hypertension awareness, treatment, and control were abstracted from reports included in the 2000 and 2010 prevalence analyses. Hypertension awareness was defined as self-reported previous diagnosis of hypertension among those with hypertension, treatment was defined as self-reported use of antihypertensive medication among those with hypertension, and control was defined as systolic blood pressure <140 mm Hg and diastolic blood pressure <90 mm Hg among those with hypertension. In addition, hypertension control was calculated among patients with treated hypertension. Data from 61 countries were used to estimate regional and global proportions of hypertension awareness, treatment, and control.

## Country-Specific Estimates

Countries were grouped into regions using the World Bank classification system updated in July 2014, which groups the high-income countries into one region and the low-and middle income countries into six geographic regions.<sup>8</sup> The included regions were: High-income Economies, East Asia and Pacific, Europe and Central Asia, Latin America and the Caribbean, Middle East and North Africa, South Asia, and Sub-Saharan Africa. The criteria used by the World Bank to define these regions include the level of socioeconomic development, epidemiologic homogeneity, and geographic proximity.<sup>8</sup> Multiple imputation procedures were used to obtain estimates for countries without data available for 2010 or 2000 prevalence, awareness, treatment, or control. Specifically, three countries that are the most similar in terms of gross national income and geographic proximity to each country with missing data were selected, logit transformations were applied to age- and gender-specific prevalence and variance estimates, and 100 values were drawn from each of their sample distributions. Three values, one from each of the three countries, were combined and logit transformed, and 100 values were drawn from each sample distribution. Ten thousand complete data sets were generalized based on the Binomial distribution with the age- and gender-specific population of each country with missing data and the probability based on the inverse-logit transformation of the values drawn. The age- and gender- specific prevalence was estimated for each of the 10,000 complete data sets and the overall age- and gender-specific prevalence was calculated based on the multiple imputation procedure.<sup>9</sup> Additional multiple imputation details and an example of multiple imputation R code follows the Supplemental Methods section (Supplemental Material page 5). In Saudi Arabia, the Philippines, Vietnam, and Malaysia, self-reported history of hypertension, instead of self-reported antihypertensive medication use, was used as part of the hypertension definition.<sup>10-13</sup> For these countries, data from a country in the same region (USA<sup>5</sup> was used for Saudi Arabia and China<sup>14</sup> for the Philippines, Vietnam and Malaysia) was used to calculate a conversion factor using both hypertension definitions (blood pressure  $\geq 140/90$  mm Hg and/or use of antihypertensive medication vs. blood pressure  $\geq 140/90$  mm Hg and/or self-reported history of hypertension). The age- and gender-specific conversion factor was applied to estimate the hypertension prevalence according to the blood pressure definition necessary for inclusion in our analyses. Conversion factors were also created for awareness, treatment, and control and were applied to reported estimates of awareness, treatment, and control from Saudi Arabia and Vietnam to generate estimates consistent with the hypertension definition used in this study.

For studies that did not report prevalence data in the 10-year age groups of interest (i.e., 20-29, 30-39, etc), age-specific prevalence was imputed using logistic regression models for each sex in each region, separately. The predictive models on the relation between age group and prevalence of hypertension were generated from studies with age-specific data within each region-sex subgroup. In addition, mean age and prevalence for men and women from each study with missing age-specific prevalence were used to calibrate the estimates of age-specific prevalence for that country. Predictive models were created separately for the 2010 and 2000 prevalence data. We tested the goodness of fit of the logistic models by calculating Cragg and Uhler's pseudo R-square for all models. The pseudo R-squares indicated good fit of all models (all  $P < 0.001$ ) for the 2010 data (High-Income Economies 0.84 in men and 0.89 in women; East Asia and Pacific 0.78 in men and 0.85 in women; Europe and Central Asia 0.75 in men and 0.92 in women; Latin America and the Caribbean 0.74 in men and 0.81 in women; Middle East and North Africa 0.81 in men and 0.89 in women; South Asia 0.74 in men and 0.57 in women; and Sub-Saharan Africa 0.46 in men and 0.57 in women) and the 2000 data (High-Income Economies 0.75 in men and 0.87 in women; East Asia and Pacific 0.70 in men and 0.79 in women; Europe and Central Asia 0.94 in men and 0.85 in women; Latin America and the Caribbean 0.53 in men and 0.79 in women; Middle East and North Africa 0.93 in men and 0.92 in women; South Asia 0.55 in men and 0.72 in women; and Sub-Saharan Africa 0.44 in men and 0.59 in women). If studies did not provide age-specific data in the 10-year age groups of interest (i.e., 20-29, 30-39, etc), we averaged the prevalence from the two closest age groups, weighting by the country's age-specific population size, to estimate the prevalence of hypertension for the age ranges of interest.

The majority of studies reported awareness, treatment, and control of hypertension by gender, but not age group. Therefore, gender-specific proportions of awareness, treatment, and control were used in analyses. For studies that did not include participants in the full age range of 20 to  $\geq 70$  years, we estimated the proportion of awareness, treatment, and control of hypertension for the entire age range. The sex-specific predictive models were created separately for 2010 and 2000 and for high-income countries and low- and middle-income countries using median age and the proportions of awareness, treatment, and control within each age- and gender-group from studies that reported age- and sex-specific awareness, treatment, and control. The proportion of control was either reported among all hypertensive individuals, among those receiving treatment, or both. If only one control proportion was reported, the other was calculated using the reported proportions of treatment and control.

## **Statistical Analysis**

In order to estimate the 2010 hypertension prevalence and absolute burden, defined as the number of adults with hypertension, by world region, sex- and age-specific prevalences of hypertension for each country were applied to the United Nations sex- and age-specific population counts in 2010 to estimate the number of people with hypertension in the country for each sex- and age-group.<sup>15</sup> The total number of persons with hypertension in each country was summed to provide an estimate of the total number of persons with hypertension for each region by sex- and age-groups, and the number from each region was added to obtain the worldwide count. The sex- and age-specific regional prevalences of hypertension for 2010 were calculated by dividing the total number of people with hypertension in each region by the number of people living in that region by sex- and age-groups. Worldwide prevalence was estimated by dividing the total number of persons with hypertension by the total adult world population. The prevalences of hypertension within each world region and worldwide were standardized by age to the 2010 world population separately for each sex and overall using the direct method.<sup>16</sup> A sensitivity analysis was conducted including only countries with reports of prevalence from both 2000 and 2010.

The same statistical methods were used to estimate the regional and global prevalence of hypertension for 2000 and 2010 using the WHO sex- and age-specific population counts in the year 2000 and 2010, respectively. Age-standardized prevalence estimates in both the year 2000 and 2010 were calculated using the 2010 world population age distribution.

Regional and global proportions of hypertension awareness, treatment, and control in 2000 and 2010 were estimated by applying sex-specific proportions of hypertension awareness, treatment, and control to the sex-specific number of people with hypertension in each country in 2000 and 2010 in order to get the number of men and women with hypertension that are aware, treated, and controlled. These numbers were summed within regions and globally and then divided by the total number of people with hypertension in each region and worldwide to get the sex-specific regional and global proportions of hypertension awareness, treatment, and control. The number of individuals in each region and globally with controlled hypertension was also divided by the total number of people with treated hypertension to get the sex-specific proportions of hypertension control among those who are treated. Due to limited awareness, treatment, and control data for some world regions in 2000, final sex-specific estimates are reported in high-income and low- and middle-income countries instead of by world region.

Standard errors for all estimates were abstracted from those studies that report them. For the remaining studies, standard errors were estimated as the square root of  $([\text{prevalence of hypertension} \times (1 - \text{prevalence of hypertension})] / \text{sample size in the survey})$ , which may slightly overestimate the standard error for surveys utilizing complex sampling designs. The standard errors for the numbers of persons with hypertension within a region and worldwide were then estimated with Taylor series approximation methods and used to calculate 95% confidence intervals.<sup>17</sup> Differences between prevalence and absolute burden estimates for 2000 and 2010 were tested using a two-tailed z-test for the difference in proportions.

## Multiple Imputation

### Steps for Multiple Imputation

1. For each of the three countries used for imputation, use the prevalence and variance to estimate the distribution of the log-transformed prevalence.
2. Randomly draw a set of 100 values from each of the three distributions and perform inverse logit transformation.
3. Use the 3 sets of 100 prevalence values to create 100 sets of three prevalence values with one prevalence value from each country. For example, the 1<sup>st</sup> prevalence value drawn from country 1's distribution would be combined with the 1<sup>st</sup> prevalence value drawn from country 2's distribution and the 1<sup>st</sup> prevalence value drawn from country 3's distribution to get a set of 3 prevalence values with one from each country. This would be repeated for the 2<sup>nd</sup> prevalence estimates drawn, etc.
4. For each of the 100 sets of 3 prevalence values, estimate the distribution of the logit-transformed prevalence from countries used for imputation
5. Randomly draw a set of 100 values from each of the distributions and perform inverse logit transformation to obtain a total of 10,000 values of the prevalence for the country with missing data
6. For the 10,000 values ( $p_i, i = 1, 2, \dots, 10,000$ ) of the prevalence and the mean sample size (N) of the three studies used for imputation, generate 10,000 datasets based on the binomial distribution [Binomial ( $N, p_i$ )]
7. For each of the 10,000 datasets, estimate the prevalence, as well as its variance, using standard statistical methods
8. Combine the estimated values of the prevalence and variance to get summary estimates of prevalence and variance (calculated from the between- and within-imputation variance) based on the multiple imputation procedure.

### An Example of R Code for Implementing Multiple Imputation

```
## To estimate age-specific (20-29 years old) prevalence of Antigua based on the age-specific (20-29 years old)
prevalence of the US, Canada, and Puerto Rico by multiple imputation

## prevalence, standard error, and sample size for the 3 countries
## 2010 men 20-29 US prevalence, variance, and sample size
p1=0.054
s1=0.007
n1=1392
## 2010 men 20-29 Canada prevalence, standard error, and sample size
p2=0.058
s2=0.014
n2=278
## 2010 men 20-29 Puerto Rico prevalence, standard error, and sample size
p3=0.126
s3=0.060
n3=31
## prevalence from 3 countries used for imputation are logit transformed
pl1=log(p1/(1-p1))
pl2=log(p1/(1-p1))
pl3=log(p1/(1-p1))
```

```

sl1=sqrt((s1^2)/(p1*(1-p1))^2)
sl2=sqrt((s2^2)/(p2*(1-p2))^2)
sl3=sqrt((s3^2)/(p3*(1-p3))^2)

##100 values are drawn from the distribution of each of the 3 countries
pr1=rnorm(100, pl1, sl1)
pr2=rnorm(100, pl2, sl2)
pr3=rnorm(100, pl3, sl3)

##3 sets of 100 values are transformed back to the prevalence from the logit and combined into 3 sets of 100
p1= exp(pr1)/(1+exp(pr1))
p2= exp(pr2)/(1+exp(pr2))
p3= exp(pr3)/(1+exp(pr3))
pd1=rbind(pd1, p1)
pd2=rbind(pd2, p2)
pd3=rbind(pd3, p3)

## calculating the mean sample size from the studies used for multiple imputation
N=(n1+n2+n3)/3

## the three sets of 100 values are combined into 100 sets of 3 values (one from the distribution of each of the
three countries. Then each of the sets of 3 prevalence values are used to create a normal distribution and 100
random samples are drawn from each one.

for (i in 1:100) {

##the 3 sets of 100 values are combined to create 100 sets of three prevalence values (one from the distribution of
each of the three countries).
p=c(pd1[i], pd2[i],pd3[i]);

##each of the 3 prevalence values is logit transformed
lgp=log(p/(1-p));

## the mean and variance of a normal distribution of each of the 100 sets of the transformed prevalence are
estimated
mlp=mean(lgp);
selp=sqrt(var(lgp));

##100 values of the logit transformed prevalence are randomly drawn for 100 imputation samples from each of
the 100 sets of transformed prevalence values
glp=rnorm(100,mlp,selp);

##transform 100 values back to prevalence from the logit of the prevalence
gp=exp(glp)/(1+exp(glp));

##generate 100 imputation samples with the mean sample size of the three countries used for multiple imputation
for each of the 100 values drawn from each of the 100 sets of prevalence values
sa=matrix(nrow=100,ncol=N);
for (j in 1:100){sa[j,]=rbinom(N,1,gp[j])}

```

```

##combine 100 imputation samples from each of 100 prevalence estimates into one matrix that is (100 x 100)
10,000 rows with columns equal to the mean sample size of the three countries used for multiple imputation
dist=rbind(dist, sa)}
##estimate the prevalence of each imputation sample
rmeans=apply(dist,1,mean)

## estimate variance of each imputation sample
rvar=apply(dist,1,var)

##overall prevalence and variance estimated by multiple imputation procedure
##combined prevalence estimate
estimate=mean(rmeans)

##calculate the within imputation variance
ubar=mean(rvar)

## calculate the between imputation variance
vectorcircle=rmeans-estimate;
vectorcir2=vectorcircle^2
B=sum(vectorcir2)/9,999

## calculate the total variance
totalvar=ubar+(1+10,000^(-1))*B

## print results
print(estimate)
print(totalvar)

```

Supplemental Figure 1. Worldwide crude prevalence of hypertension in adults 20 years and older by country in 2010 (upper) and 2000 (lower)

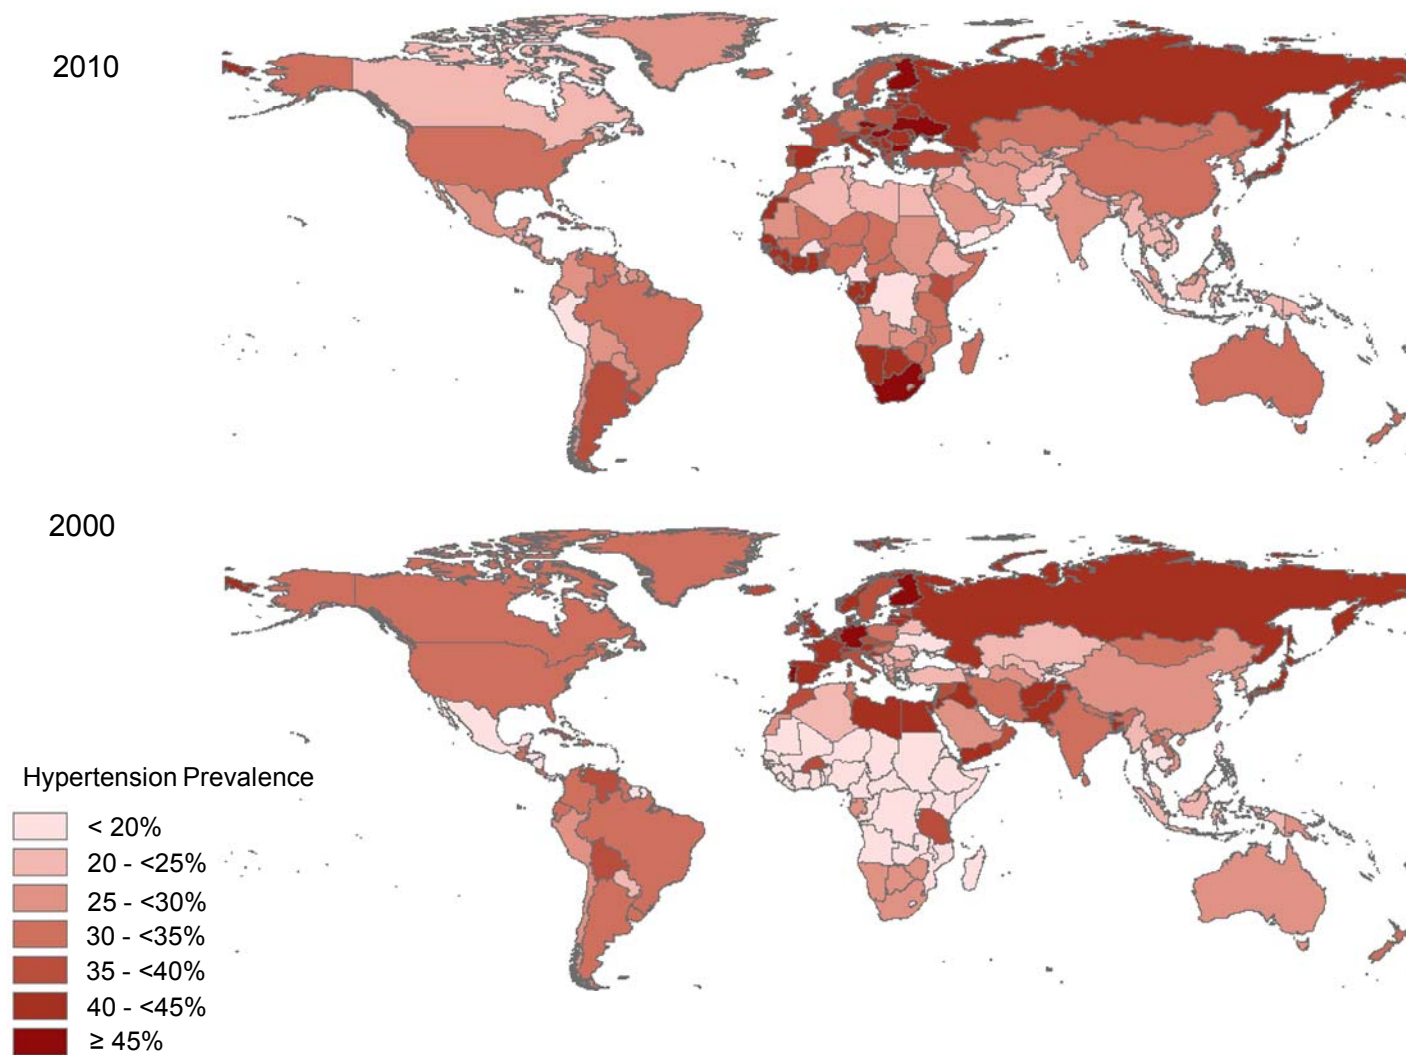



**Supplemental Figure 2. Worldwide age- and sex-standardized prevalence of hypertension in adults 20 years and older by country in 2010 (upper) and 2000 (lower), countries with imputed data left blank**

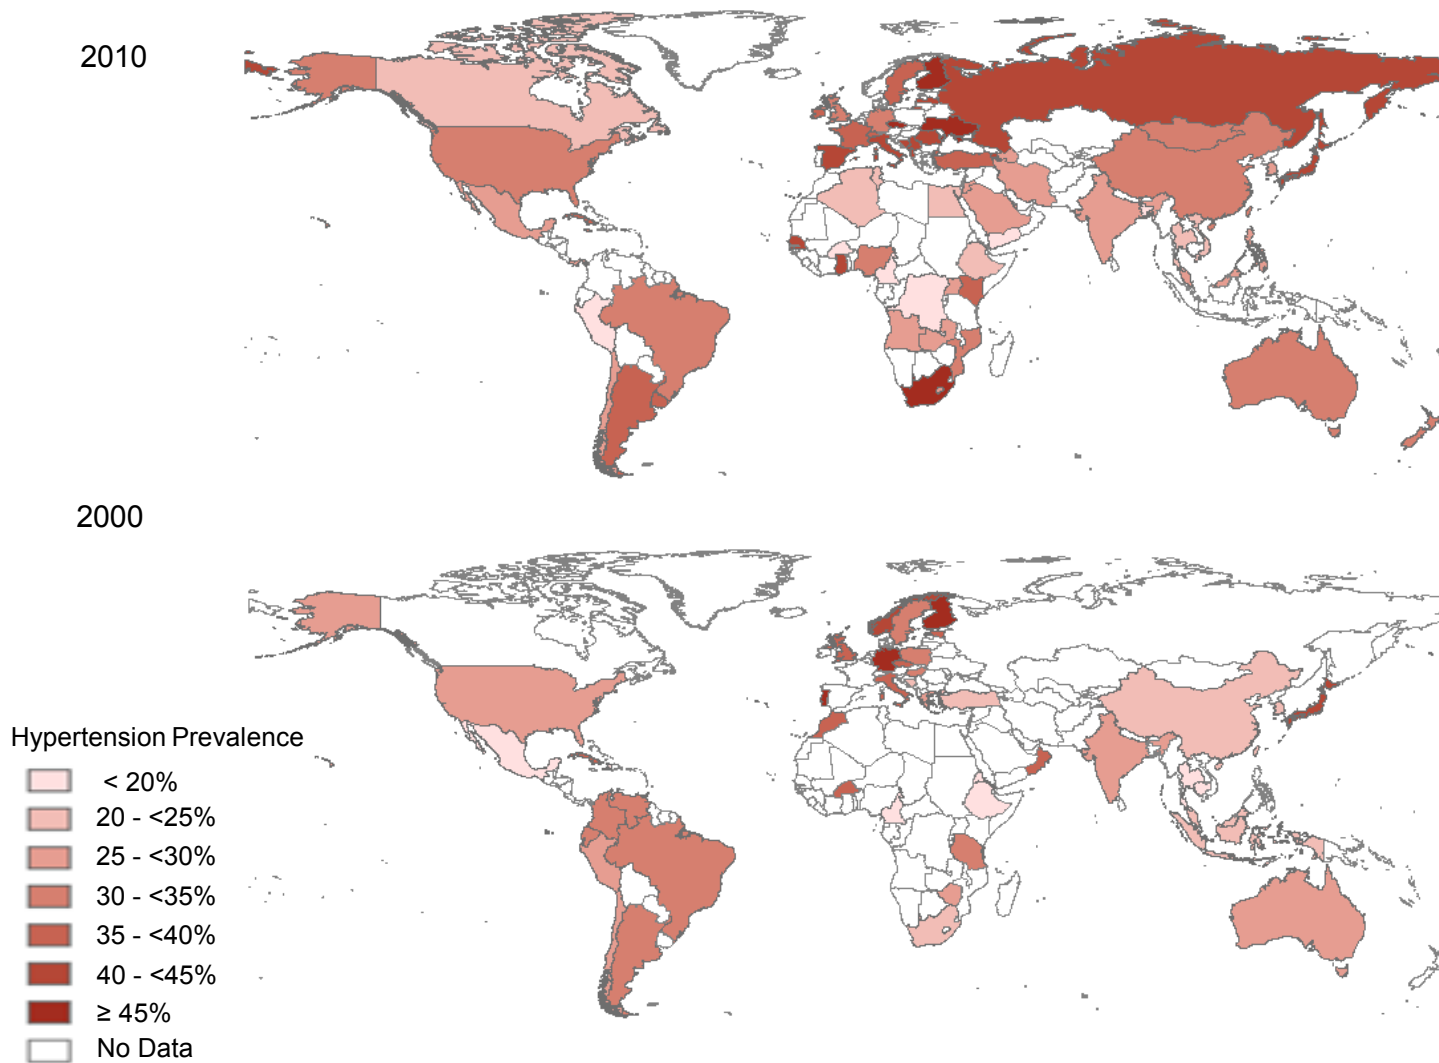

**Supplemental Table 1. Characteristics of included studies for 2010 hypertension prevalence by world region**

| Country                         | Data Collection Year | Study sample | Sample size | Age, years | Response Rate, % | Blood Pressure Methods |                                    |                      |
|---------------------------------|----------------------|--------------|-------------|------------|------------------|------------------------|------------------------------------|----------------------|
|                                 |                      |              |             |            |                  | Device                 | Measures/visits (n)                | Preparation          |
| <b>High-income Countries</b>    |                      |              |             |            |                  |                        |                                    |                      |
| Australia <sup>18</sup>         | 2011-2012            | National     | 24,392      | ≥20        | 85               | Automated              | 2/1 (2 <sup>nd</sup> reading used) | --                   |
| Canada <sup>19,20</sup>         | 2009-2011            | National     | 3,659       | 20-79      | 55               | Automated              | 6/1 (mean of last 5)               | 5 minutes rest       |
| Chile <sup>21</sup>             | 2009-2010            | National     | 5,416       | 15-65      | 72               | Automated              | 3/1                                | 5 minutes rest       |
| Czech Republic <sup>22</sup>    | 2007-2008            | Multisite    | 2,246       | 25-64      | 63               | Standard mercury       | 3/1 (mean of last 2)               | 5 minutes rest       |
| Finland <sup>23</sup>           | 2007                 | Multisite    | 2,925       | 25-64      | 61               | Standard mercury       | 3/1 (mean of first 2)              | 5 minutes rest       |
| France <sup>24</sup>            | 2006-2007            | National     | 2,266       | 18-74      | 46               | Automated              | 3/1 (mean of last 2)               | 5 minutes rest       |
| Germany <sup>25</sup>           | 2008-2011            | National     | 7,096       | 18-79      | 50               | Automated              | 3/1 (mean of last 2)               | 5 minutes rest       |
| Ireland <sup>26,27</sup>        | 2007                 | National     | 1,207       | ≥45        | 62               | Automated              | 3/1 (mean of last 2)               | Resting              |
| Italy <sup>28</sup>             | 2002-2008            | Regional     | 9,845       | ≥18        | 80               | Standard mercury       | 2/1                                | Several minutes rest |
| Japan <sup>29</sup>             | 2010                 | National     | 2,759       | ≥30        | 77               | Standard mercury       | 1/1                                | 5 minutes rest       |
| Republic of Korea <sup>30</sup> | 2011                 | National     | 5,342       | ≥30        | 80               | Standard mercury       | 3/1 (mean of last 2)               | 5 minutes rest       |
| Latvia <sup>31</sup>            | 2008-2009            | National     | 3,807       | 25-74      | 64               | Automated              | 3/1 (mean of last 2)               | 5 minutes rest       |
| Luxembourg <sup>32,33</sup>     | 2007-2009            | National     | 1,432       | 18-69      | 32               | Automated              | 3/1 (mean of last 2)               | 5 minutes rest       |
| New Zealand <sup>34</sup>       | 2008-2009            | National     | 4,407       | ≥15        | 61               | Automated              | 3/1 (mean of last 2)               | --                   |

|                                         |           |          |        |       |    |                     |                                    |                    |
|-----------------------------------------|-----------|----------|--------|-------|----|---------------------|------------------------------------|--------------------|
| Puerto Rico <sup>35</sup>               | 2013*     | Regional | 452    | 18-79 | 63 | Aneroid             | 3/1 (mean of all 3)                | 5 minutes rest     |
| Qatar <sup>36</sup>                     | 2012      | National | 2,437  | 18-64 | 88 | Automated           | 3/1 (mean of last 2)               | 15 minutes rest    |
| Russian Federation <sup>6†</sup>        | 2007-2010 | National | 4,355  | ≥18   | 83 | Automated           | 3/1 (mean of all 3)                | Seated and relaxed |
| Saudi Arabia <sup>10</sup>              | 2005      | National | 4,758  | 15-64 | 98 | Automated           | 3/1 (mean of all 3)                | 5 minutes rest     |
| Singapore <sup>37</sup>                 | 2010      | National | 4,337  | 30-69 | 58 | Standard mercury    | 2/1 (mean of 2)                    | Adequately rested  |
| Spain <sup>38</sup>                     | 2008-2010 | National | 11,957 | ≥18   | 51 | Automated           | 6/1 (mean of at least 3 of last 5) | 3-5 minutes rest   |
| Sweden <sup>39</sup>                    | 2009      | Regional | 1,729  | 25-74 | 69 | Random-zero mercury | 2/1 (mean of 2)                    | 5 minutes rest     |
| Switzerland <sup>40</sup>               | 2003-2006 | Regional | 6,182  | 35-75 | 41 | Automated           | 3/1 (mean of last 2)               | 10 minutes rest    |
| United Kingdom (England) <sup>41</sup>  | 2011      | National | 4,753  | ≥16   | 59 | Automated           | 3/1 (mean of last 2)               | 5 minutes rest     |
| United Kingdom (Scotland) <sup>42</sup> | 2010-2011 | National | 1,714  | ≥16   | 56 | Automated           | 3/1 (mean of last 2)               | 5 minutes rest     |
| United States <sup>5</sup>              | 2007-2012 | National | 17,036 | ≥20   | 69 | Standard mercury    | 3/1 (mean of last 2)               | 5 minutes rest     |
| Uruguay <sup>7</sup>                    | 2010-2012 | Regional | 1,584  | 35-74 | 73 | Aneroid             | 3/1 (mean of last 2)               | 5 minutes rest     |
| <b>East Asia and Pacific</b>            |           |          |        |       |    |                     |                                    |                    |
| China <sup>14</sup>                     | 2010      | National | 98,658 | ≥18   | 90 | Automated           | 3/1 (mean of all 3)                | 5 minutes rest     |
| Malaysia <sup>13</sup>                  | 2005-2006 | National | 2,572  | 25-64 | 85 | Standard mercury    | 2/1                                | 5 minutes rest     |
| Mongolia <sup>43</sup>                  | 2009      | National | 5,438  | 15-64 | 95 | Automated           | 3/1 (mean of all 3)                | 5 minutes rest     |
| Philippines <sup>11</sup>               | 2008      | National | 7,215  | ≥20   | 93 | Standard mercury    | 3/1 (mean of all 3)                | 5 minutes rest     |
| Thailand <sup>44</sup>                  | 2009      | National | 20,426 | ≥15   | 93 | Automated           | 3/1 (mean of last 2)               | 5 minutes rest     |
| Vietnam <sup>12</sup>                   | 2002-2008 | National | 9,823  | ≥25   | 93 | Automated           | 2/1                                | 5 minutes rest     |

| Europe and Central Asia         |           |           |        |       |    |                  |                                    |                                              |
|---------------------------------|-----------|-----------|--------|-------|----|------------------|------------------------------------|----------------------------------------------|
| Albania <sup>45, 46</sup>       | 2008-2009 | National  | 6,417  | 15-49 | 96 | Automated        | 3/1 (mean of all 3)                | 10 minutes between measurements              |
| Armenia <sup>45,47</sup>        | 2005      | National  | 7,381  | 15-49 | 93 | Automated        | 3/1 (mean of last 2)               | 5 minutes between measurements               |
| Azerbaijan <sup>45,48</sup>     | 2006      | National  | 10,949 | 15-59 | 96 | Automated        | 3/1 (mean of last 2)               | 10 minutes between measurements              |
| Bosnia <sup>49</sup>            | 2012      | National  | 2,435  | 25-64 | 91 | Standard mercury | 3/1 (mean of last 2)               | 5 minutes rest                               |
| Romania <sup>50</sup>           | 2011-2012 | National  | 1,975  | 18-80 | 69 | Automated        | 3/2 (mean of last 2 at each visit) | 5 minutes rest                               |
| Serbia <sup>51</sup>            | 2006      | National  | 14,204 | ≥20   | 81 | --               | 3/1 (mean of first 2)              | 5 minutes rest                               |
| Turkey <sup>52</sup>            | 2007-2009 | National  | 10,748 | ≥18   | -- | --               | 2/1 (mean of 2)                    | --                                           |
| Ukraine <sup>45,53</sup>        | 2007      | National  | 7,454  | 15-49 | 95 | Automated        | 3/1 (mean of last 2)               | 10 minutes between measurements              |
| Latin America and the Caribbean |           |           |        |       |    |                  |                                    |                                              |
| Argentina <sup>7</sup>          | 2010-2012 | Multisite | 3,990  | 35-74 | 73 | Aneroid          | 3/1 (mean of last 2)               | 5 minutes rest                               |
| Brazil <sup>54</sup>            | 2007      | Regional  | 2,022  | 20-59 | 99 | Automated        | 2/1 (last measurement used)        | Seated with relaxed arm, after questionnaire |
| Brazil <sup>55</sup>            | 2006      | Regional  | 1,003  | ≥18   | -- | Automated        | 2/1 (last measurement used)        | Seated with relaxed arm                      |
| Brazil <sup>56</sup>            | 2004-2005 | Regional  | 1,717  | 18-93 | 95 | Aneroid          | 3/1 (mean of all 3)                | 5-10 minutes rest                            |
| Brazil <sup>57</sup>            | 2008-2009 | Regional  | 198    | ≥30   | 85 | Automated        | 3/1 (mean of all 3)                | 5 minutes rest                               |
| Cuba <sup>58</sup>              | 2010-2011 | Regional  | 1,496  | 15-74 | -- | Standard mercury | 3/1 (mean of last 2)               | --                                           |
| Grenada <sup>59</sup>           | 2008-2009 | National  | 2,827  | ≥18   | 60 | Automated        | 3/1 (mean of all 3)                | 5 minutes rest                               |
| Jamaica <sup>60,61</sup>        | 2007-2008 | National  | 2,848  | 15-74 | 98 | Standard mercury | 3/1                                | 5 minutes rest                               |

|                                     |           |           |        |       |    |                  |                                      |                                 |
|-------------------------------------|-----------|-----------|--------|-------|----|------------------|--------------------------------------|---------------------------------|
| Mexico <sup>6†</sup>                | 2009-2010 | National  | 2,742  | ≥18   | 53 | Automated        | 3/1 (mean of all 3)                  | Seated and relaxed              |
| Panama <sup>62</sup>                | 2010-2011 | Regional  | 3,406  | ≥18   | -- | Automated        | 3/1 (mean of all 3)                  | 5 minutes rest                  |
| Peru <sup>63</sup>                  | 2004-2006 | Regional  | 1,878  | 20-80 | 85 | Standard mercury | 2/2                                  | 5 minutes rest                  |
| <b>Middle East and North Africa</b> |           |           |        |       |    |                  |                                      |                                 |
| Algeria <sup>64</sup>               | 2010      | Regional  | 722    | ≥40   | 80 | Automated        | 3/1 (mean of last 2)                 | 5 minutes rest                  |
| Egypt <sup>65</sup>                 | 2008      | National  | 12,008 | 15-59 | 93 | Automated        | 3/1 (mean of last 2)                 | 10 minutes between measurements |
| Iran <sup>66</sup>                  | 2004-2005 | National  | 68,250 | 25-64 | -- | Aneroid          | 2/1 (mean of 2)                      | 10 minutes rest                 |
| Jordan <sup>67</sup>                | 2009      | National  | 4,117  | ≥25   | 68 | Standard mercury | 1/1                                  | 5 minutes rest                  |
| Tunisia <sup>68</sup>               | 2009-2010 | National  | 8,007  | 35-74 | 80 | Standard mercury | 2/1 (mean of 2)                      | 5 minutes rest                  |
| Yemen <sup>69</sup>                 | 2008      | Multisite | 10,242 | 15-69 | -- | Automated        | 3/2 (mean of last 2 from each visit) | 15 minutes rest                 |
| <b>South Asia</b>                   |           |           |        |       |    |                  |                                      |                                 |
| Bangladesh <sup>70</sup>            | 2009-2010 | National  | 9,275  | ≥25   | 85 | Aneroid          | 2/1 (mean of 2)                      | 5 minutes rest                  |
| India <sup>71</sup>                 | 2013*     | Regional  | 3,489  | 15-64 | -- | Automated        | 2/1 (mean of 2)                      | 5 minutes between measurements  |
| India <sup>72</sup>                 | 2004-2007 | Multisite | 4,624  | 35-70 | 58 | Automated        | 3/1 (mean of 3)                      | 5 minutes rest                  |
| India <sup>73</sup>                 | 2007-2008 | Regional  | 4,711  | ≥30   | 80 | Standard mercury | 2/1 (mean of 2)                      | 5 minutes rest                  |
| India <sup>6†</sup>                 | 2007-2008 | National  | 11,230 | ≥18   | 68 | Automated        | 3/1 (mean of all 3)                  | Seated and relaxed              |
| India <sup>74</sup>                 | 2011*     | Regional  | 1,477  | ≥18   | 71 | Automated        | 3/1(mean of last 2)                  | 15 minutes rest                 |
| <b>Sub-Saharan Africa</b>           |           |           |        |       |    |                  |                                      |                                 |
| Angola <sup>75</sup>                | 2011      | Regional  | 1,464  | 18-64 | -- | Automated        | 3/1(mean of last 2)                  | 15 minutes rest                 |
| Burkina Faso <sup>76</sup>          | 2012      | Regional  | 1,481  | ≥18   | 90 | Automated        | 3/1(mean of last 2)                  | 25-30 minutes rest              |

|                                                |           |           |       |       |    |                  |                     |                                                  |
|------------------------------------------------|-----------|-----------|-------|-------|----|------------------|---------------------|--------------------------------------------------|
| Cameroon <sup>77</sup>                         | 2007      | Regional  | 1,623 | ≥25   | 83 | Automated        | 3/1(mean of last 2) | 5 minutes rest                                   |
| Democratic Republic of the Congo <sup>78</sup> | 2005      | Regional  | 1,952 | ≥15   | 98 | Automated        | 3/1                 | 5 minutes rest                                   |
| Ethiopia <sup>79</sup>                         | 2006      | Regional  | 3,273 | 25-64 | 93 | Automated        | 3/1(mean of last 2) | 5 minutes rest                                   |
| Ethiopia <sup>80</sup>                         | 2010-2011 | Regional  | 1,183 | ≥18   | -- | Standard mercury | 2/1 (mean of 2)     | 5 minutes rest                                   |
| Ghana <sup>6†</sup>                            | 2008-2009 | National  | 5,108 | ≥18   | 81 | Automated        | 3/1 (mean of all 3) | Seated and relaxed                               |
| Kenya <sup>81</sup>                            | 2008      | Regional  | 469   | ≥18   | -- | Aneroid          | 1/1                 | 10 minutes rest                                  |
| Lesotho <sup>82</sup>                          | 2009-2010 | National  | 7,289 | ≥18   | 94 | Automated        | 3/1(mean of last 2) | 10 minutes between measurements                  |
| Mozambique <sup>83</sup>                       | 2005      | National  | 3,323 | 25-64 | 98 | Automated        | 2/1 (mean of 2)     | 5 minutes rest                                   |
| Nigeria <sup>84</sup>                          | 2007      | Regional  | 2,097 | ≥20   | 93 | Automated        | 3/1                 | 10 minutes rest                                  |
| Senegal <sup>85</sup>                          | 2009      | Regional  | 500   | ≥50   | -- | Automated        | 2/1                 | Measurements taken at midpoint and end of survey |
| South Africa <sup>6†</sup>                     | 2007-2008 | National  | 4,223 | ≥18   | 75 | Automated        | 3/1 (mean of all 3) | Seated and relaxed                               |
| Uganda <sup>86</sup>                           | 2006      | Regional  | 842   | ≥20   | -- | Automated        | 3/1(mean of last 2) | 5 minutes rest                                   |
| Zambia <sup>87</sup>                           | 2008      | Multisite | 2,093 | ≥25   | -- | Automated        | 3/1 (mean of all 3) | 15 minutes rest                                  |

\*Year of publication as year of survey not given; †The World Health Organization's Study on global AGEing and adult health (SAGE) study defined hypertension as systolic blood pressure ≥ 140 mm Hg, diastolic blood pressure ≥ 90 mm, or self-reported "medications or other treatment" in the last two weeks, where "other treatment might include weight loss program or change in eating habits".

**Supplemental Table 2. Characteristics of included studies for 2000 hypertension prevalence by world region**

| Country                         | Data Collection Year | Study sample | Sample size | Age, years | Response Rate, % | Blood Pressure Methods        |                      |                      |
|---------------------------------|----------------------|--------------|-------------|------------|------------------|-------------------------------|----------------------|----------------------|
|                                 |                      |              |             |            |                  | Device                        | Measures/visits (n)  | Preparation          |
| <b>High-income Economies</b>    |                      |              |             |            |                  |                               |                      |                      |
| Australia <sup>88, 89</sup>     | 1999-2000            | National     | 11,247      | ≥25        | 55               | Automated or standard mercury | 2/1 (mean of 2)      | 5 minutes rest       |
| Chile <sup>90,91</sup>          | 2003-2005            | Regional     | 1,655       | 25-64      | --               | Standard mercury              | 2/1 (mean of 2)      | 5 minutes rest       |
| Czech Republic <sup>92</sup>    | 2000-2001            | National     | 3,320       | 25-64      | 63               | Standard mercury              | 3/1 (mean of last 2) | 5 minutes rest       |
| Estonia <sup>93</sup>           | 1999-2001            | Regional     | 1,326       | 20-54      | 64               | Standard mercury              | 2/1 (mean of 2)      | 5 minutes rest       |
| Finland <sup>94</sup>           | 1997                 | Multisite    | 4,399       | 25-64      | 73               | Standard mercury              | 2/1 (mean of 2)      | 5 minutes rest       |
| Germany <sup>95</sup>           | 1997-1999            | National     | 7,124       | 18-79      | --               | Standard mercury              | 3/1 (mean of last 2) | 5 minutes rest       |
| Greece <sup>96</sup>            | 1997                 | Regional     | 665         | 18-91      | 76               | Standard mercury              | 3/1 (mean of 3)      | 5 minutes rest       |
| Hong Kong <sup>97</sup>         | 1995-1996            | National     | 1,010       | 25-74      | 80               | Standard mercury              | 2/1 (mean of 2)      | 10 minutes rest      |
| Italy <sup>98</sup>             | 1998                 | National     | 8,233       | 35-74      | --               | Standard mercury              | 2/1 (mean of 2)      | 5 minutes rest       |
| Japan <sup>30</sup>             | 2000                 | National     | 5,570       | ≥30        | --               | Standard mercury              | 1/1                  | 5 minutes rest       |
| Republic of Korea <sup>99</sup> | 2001                 | National     | 6,074       | ≥20        | --               | Standard mercury              | 2/1 (mean of 2)      | 10 minutes rest      |
| Norway <sup>100</sup>           | 1995-1997            | Regional     | 62,104      | 20-79      | 71               | Automated                     | 3/1 (mean of last 2) | 2 minutes rest       |
| Oman <sup>101</sup>             | 2000                 | National     | 7,011       | ≥20        | 91               | Standard mercury              | 2/1 (mean of 2)      | 5 minutes rest       |
| Poland <sup>102</sup>           | 2002                 | National     | 3,051       | ≥18        | 78               | Automated                     | 3/3                  | Several minutes rest |
| Portugal <sup>103</sup>         | 2003                 | National     | 5,023       | 18-90      | --               | Automated                     | 3/1 (mean of all 3)  | --                   |
| Sweden <sup>104</sup>           | 2001-2002            | Regional     | 1,032       | 25-64      | 39               | Automated                     | 2/1                  | 2 minutes rest       |

|                                        |           |           |         |       |    |                  |                      |                                  |
|----------------------------------------|-----------|-----------|---------|-------|----|------------------|----------------------|----------------------------------|
| Taiwan <sup>105</sup>                  | 2002      | National  | 7,566   | ≥19   | 67 | Standard mercury | 2/1                  | 5-10 minutes rest                |
| Trinidad and Tobago <sup>106</sup>     | 2001      | Regional  | 461     | ≥24   | 74 | Automated        | 3/1 (mean of last 2) | 5 minutes                        |
| United Kingdom <sup>107</sup>          | 1998      | National  | 11,529  | ≥20   | 51 | Automated        | 3/1 (mean of last 2) | 5 minutes rest                   |
| United States <sup>108</sup>           | 1999-2000 | National  | 4,444   | ≥20   | 69 | Standard mercury | 3/1 (mean of 3)      | 5 minutes rest                   |
| <b>East Asia and Pacific</b>           |           |           |         |       |    |                  |                      |                                  |
| Cambodia <sup>109</sup>                | 2004      | Multisite | 2,246   | ≥25   | 95 | --               | 2/1 (mean of 2)      | --                               |
| China <sup>110,111</sup>               | 2002      | National  | 141,892 | ≥18   | 88 | Standard mercury | 2/1                  | 5 minutes rest                   |
| Indonesia <sup>112</sup>               | 2002      | Regional  | 2,963   | 15-74 | 95 | Automated        | 2/1                  | --                               |
| Malaysia <sup>113</sup>                | 2004      | National  | 16,440  | ≥15   | 93 | Standard mercury | 2/1 (mean of 2)      | --                               |
| Thailand <sup>114</sup>                | 2000-2001 | National  | 5,350   | ≥35   | 68 | Standard mercury | 3/1                  | 5 minutes rest                   |
| <b>Europe and Central Asia</b>         |           |           |         |       |    |                  |                      |                                  |
| Bosnia and Herzegovina <sup>115</sup>  | 2002      | National  | 2,750   | 25-64 | 92 | Standard mercury | 2/1 (mean of 2)      | 5 minutes rest                   |
| Hungary <sup>116</sup>                 | 1996      | Regional  | 19,961  | 30-65 | 92 | --               | 2/1                  | 5 minutes rest                   |
| Turkey <sup>117</sup>                  | 2003      | National  | 4,910   | ≥18   | 99 | Standard mercury | 3/1 (mean of all 3)  | 30 minutes rest                  |
| <b>Latin America and the Caribbean</b> |           |           |         |       |    |                  |                      |                                  |
| Argentina <sup>90,91</sup>             | 2003-2005 | Regional  | 1,482   | 25-64 | -- | Standard mercury | 2/1 (mean of 2)      | 5 minutes rest                   |
| Brazil <sup>118</sup>                  | 1999-2000 | Regional  | 1,439   | ≥20   | 82 | Automated        | 6/1 (mean of last 5) | --                               |
| Brazil <sup>119</sup>                  | 1999-2000 | Regional  | 2,268   | 25-64 | 73 | Standard mercury | 3/1 (mean of last 2) | 5 minutes rest                   |
| Brazil <sup>120</sup>                  | 2004*     | Regional  | 400     | ≥25   | -- | Standard mercury | 1/1                  | --                               |
| Brazil <sup>121</sup>                  | 2004      | Regional  | 285     | ≥18   | 85 | Automated        | 2/1 (mean of 2)      | --                               |
| Brazil <sup>122</sup>                  | 2003      | Regional  | 1,020   | 20-60 | 94 | Aneroid          | 2/1                  | BP measured at middle and end of |



|                                     |           |           |        |       |    |                  |                      |                                 |  |
|-------------------------------------|-----------|-----------|--------|-------|----|------------------|----------------------|---------------------------------|--|
| Columbia <sup>90,91</sup>           | 2003-2005 | Regional  | 1,553  | 25-64 | -- | Standard mercury | 2/1 (mean of 2)      | 5 minutes rest                  |  |
| Cuba <sup>123</sup>                 | 2001-2002 | Regional  | 1,475  | 25-74 | 80 | Standard mercury | 3/1 (mean of last 2) | --                              |  |
| Ecuador <sup>90,91</sup>            | 2003-2005 | Regional  | 1,638  | 25-64 | -- | Standard mercury | 2/1 (mean of 2)      | 5 minutes rest                  |  |
| Haiti <sup>124</sup>                | 2002-2003 | Regional  | 1,113  | ≥20   | 69 | Standard mercury | 2/1 (mean of 2)      | 10 minutes rest                 |  |
| Mexico <sup>90,91</sup>             | 2003-2005 | Regional  | 1,722  | 25-64 | -- | Standard mercury | 2/1 (mean of 2)      | 5 minutes rest                  |  |
| Peru <sup>90,91</sup>               | 2003-2005 | Regional  | 1,652  | 25-64 | -- | Standard mercury | 2/1 (mean of 2)      | 5 minutes rest                  |  |
| Venezuela <sup>125</sup>            | 1996      | National  | 7,424  | ≥20   |    | Standard mercury | 3/1                  | --                              |  |
| <b>Middle East and North Africa</b> |           |           |        |       |    |                  |                      |                                 |  |
| Morocco <sup>126</sup>              | 2000      | National  | 1,802  | ≥20   | 90 | Aneroid          | 2/1 (mean of 2)      | 10 minutes rest                 |  |
| <b>South Asia</b>                   |           |           |        |       |    |                  |                      |                                 |  |
| India <sup>127</sup>                | 1994-1995 | Regional  | 2,559  | 21-70 | 86 | Random zero      | 3/2 (mean of 3)      | 5 minute rest                   |  |
| India <sup>128</sup>                | 1997      | Regional  | 1,806  | 25-64 | 90 | Standard mercury | 3/1 (mean of last 2) | 5 minute rest                   |  |
| India <sup>129</sup>                | 1997      | Regional  | 1,935  | ≥25   | 87 | Standard mercury | 1/1                  | 5 minute rest                   |  |
| India <sup>130</sup>                | 2001      | Regional  | 2,350  | ≥20   | 90 | Standard mercury | 2/1 (mean of 2)      | 5 minutes between measurements  |  |
| India <sup>131</sup>                | 2001      | Regional  | 4,955  | ≥30   | -- | --               | 2/1 (mean of 2)      | 10 minutes between measurements |  |
| <b>Sub-Saharan Africa</b>           |           |           |        |       |    |                  |                      |                                 |  |
| Burkina Faso <sup>132</sup>         | 2004      | Regional  | 2,087  | ≥35   | -- | Automated        | 3/1 (mean of 2)      | 10 minutes rest                 |  |
| Cameroon <sup>133</sup>             | 2003      | Multisite | 10,011 | ≥15   | 93 | Automated        | 3/1 (mean of all 3)  | 5 minutes rest                  |  |
| Cameroon <sup>134</sup>             | 1998*     | Multisite | 1,798  | 25-74 | 91 | Standard mercury | 3/1 (mean of last 2) | 30 minutes rest                 |  |

|                             |           |           |        |       |         |                  |                      |                 |
|-----------------------------|-----------|-----------|--------|-------|---------|------------------|----------------------|-----------------|
| Cameroon <sup>135</sup>     | 1995      | Regional  | 1,467  | ≥25   | 90 - 99 | Standard mercury | 3/1                  | 10 minutes rest |
| Eritrea <sup>136</sup>      | 2004      | National  | 2,352  | 15-64 | 96      | Automated        | 2/1                  | 5 minutes rest  |
| Ethiopia <sup>137</sup>     | 2003-2004 | Regional  | 4,050  | 25-64 | --      | Automated        | 3/1(mean of last 2)  | 5 minutes rest  |
| Seychelles <sup>138</sup>   | 2004      | National  | 1,255  | 25-64 | 86      | Standard mercury | 3/1(mean of last 2)  | 30 minutes rest |
| South Africa <sup>139</sup> | 1998      | National  | 13,802 | 15-65 | 92      | Automated        | 3/1 (mean of 2 or 3) | 5 minutes rest  |
| Tanzania <sup>140</sup>     | 1996-1997 | Multisite | 1,698  | ≥15   | 64 - 85 | Standard mercury | 2/1 (mean of 2)      | --              |
| Zimbabwe <sup>141</sup>     | 1995      | Regional  | 775    | ≥25   | 57      | Automated        | 3/1 (mean of last 2) | 5 minutes rest  |

\*Year of publication as year of survey not given.

**Supplemental Table 3. Gender-specific hypertension awareness, treatment, and control in 2010 in countries with data by world region**

| Country                      | Awareness |       | Treatment |       | Control (among treated) |       | Control (among hypertension) |       |
|------------------------------|-----------|-------|-----------|-------|-------------------------|-------|------------------------------|-------|
|                              | Men       | Women | Men       | Women | Men                     | Women | Men                          | Women |
| <b>High Income Economies</b> |           |       |           |       |                         |       |                              |       |
| Australia                    | --        | --    | 52.5      | 59.1  | 58.7                    | 55.8  | 30.8                         | 33.0  |
| Chile                        | 55.2      | 75.6  | 25.8      | 49.5  | 33.8                    | 50.1  | 8.7                          | 24.8  |
| Czech Republic               | 68.4      | 71.4  | 58.2      | 58.9  | 41.9                    | 42.2  | 24.4                         | 24.9  |
| Finland                      | 63.3      | 72.7  | 31.3      | 39.9  | 33.8                    | 39.9  | 10.6                         | 15.9  |
| France                       | 46.9      | 58.8  | 41.0      | 62.0  | 41.7                    | 58.4  | 17.1                         | 36.2  |
| Germany                      | 77.9      | 86.6  | --        | --    | --                      | --    | --                           | --    |
| Ireland                      | --        | --    | 30.4      | 45.2  | 27.8                    | 40.7  | 8.5                          | 18.4  |
| Italy                        | 46.6      | 61.6  | 38.3      | 53.4  | 46.7                    | 42.7  | 17.9                         | 22.8  |
| Japan                        | --        | --    | 47.1      | 51.4  | 32.5                    | 41.6  | 36.9                         | 49.4  |
| Korea, Rep.                  | 58.5      | 76.1  | 51.7      | 71.3  | 70.5                    | 68.4  | 15.3                         | 21.4  |
| Luxembourg                   | 38.5      | 42.4  | --        | --    | --                      | --    | --                           | --    |
| Puerto Rico                  | 82.9      | 80.7  | 71.4      | 76.5  | --                      | --    | --                           | --    |
| Russian Federation           | 53.3      | 64.9  | 42.4      | 54.2  | 14.3                    | 22.5  | 6.1                          | 12.2  |
| Saudi Arabia                 | 35.6      | 52.0  | 33.1      | 42.7  | 32.0                    | 41.1  | 7.5                          | 13.6  |
| Singapore                    | 70.8      | 77.2  | --        | --    | --                      | --    | --                           | --    |
| Spain                        | 50.9      | 64.6  | --        | --    | --                      | --    | --                           | --    |
| Sweden                       | --        | --    | 45.6      | 55.7  | 50.3                    | 46.2  | 22.9                         | 25.7  |
| Switzerland                  | 60.0      | 65.0  | 46.0      | 52.0  | 45.0                    | 50.0  | 21.0                         | 26.0  |
| United Kingdom               | 61.0      | 66.0  | 52.4      | 58.2  | 61.8                    | 59.8  | 32.4                         | 34.8  |
| United States                | 78.1      | 84.4  | 69.3      | 79.2  | 69.6                    | 68.1  | 48.3                         | 54.1  |
| Uruguay                      | 54.8      | 82.0  | 43.3      | 68.3  | 36.8                    | 52.9  | 15.9                         | 36.1  |

| <b>East Asia and Pacific</b>           |      |      |      |      |      |      |      |      |
|----------------------------------------|------|------|------|------|------|------|------|------|
| China                                  | 30.4 | 36.7 | 20.6 | 27.7 | 17.0 | 15.5 | 3.5  | 4.3  |
| Mongolia                               | 25.7 | 51.3 | 28.1 | 54.1 | 26.7 | 39.6 | 7.5  | 21.4 |
| Thailand                               | 39.5 | 59.4 | 30.3 | 51.3 | --   | --   | --   | --   |
| Vietnam                                | 37.9 | 53.2 | 22.1 | 36.7 | 28.0 | 40.3 | 3.8  | 9.9  |
| <b>Europe and Central Asia</b>         |      |      |      |      |      |      |      |      |
| Albania                                | 14.4 | 29.9 | 6.1  | 16.7 | 19.7 | 17.9 | 1.2  | 3.0  |
| Armenia                                | 25.8 | 25.7 | 10.3 | 19.1 | 23.1 | 36.6 | 2.4  | 7.0  |
| Azerbaijan                             | 17.6 | 53.0 | 12.0 | 46.2 | 36.2 | 47.6 | 4.4  | 22.0 |
| Bosnia                                 | 40.2 | 57.2 | 35.5 | 54.2 | 25.4 | 41.0 | 9.0  | 22.2 |
| Romania                                | 62.2 | 75.6 | 49.7 | 66.9 | 27.4 | 23.6 | 13.6 | 15.8 |
| Serbia                                 | 48.6 | 66.5 | 56.2 | 63.2 | 18.8 | 22.1 | 10.6 | 14.0 |
| Turkey                                 | 36.9 | 55.7 | 23.6 | 38.9 | --   | --   | --   | --   |
| Ukraine                                | 31.9 | 64.6 | 16.8 | 57.4 | 21.9 | 20.9 | 3.7  | 12.0 |
| <b>Latin America and the Caribbean</b> |      |      |      |      |      |      |      |      |
| Argentina                              | 46.7 | 64.6 | 32.6 | 52.1 | 31.6 | 37.4 | 10.3 | 19.5 |
| Brazil                                 | --   | --   | 44.0 | 73.0 | 30.3 | 47.7 | 13.3 | 34.9 |
| Cuba                                   | 54.8 | 76.0 | 44.1 | 67.9 | 46.2 | 49.4 | 20.3 | 33.5 |
| Jamaica                                | 30.6 | 69.6 | 21.0 | 57.8 | 31.2 | 44.9 | 6.6  | 26.0 |
| Mexico                                 | 24.8 | 41.0 | 17.4 | 33.8 | 17.4 | 24.9 | 3.0  | 8.4  |
| Panama                                 | 53.1 | 73.6 | 51.9 | 71.9 | 35.3 | 50.9 | 17.9 | 34.6 |
| Peru                                   | 45.4 | 50.5 | 35.7 | 43.4 | 34.7 | 36.2 | 12.4 | 15.7 |
| <b>Middle East and North Africa</b>    |      |      |      |      |      |      |      |      |
| Algeria                                | --   | --   | 22.2 | 39.6 | 20.5 | 24.3 | 4.5  | 9.6  |
| Egypt                                  | 55.7 | 79.7 | 33.9 | 48.5 | 50.7 | 55.7 | 17.2 | 27.0 |
| Iran, Islamic Rep.                     | 22.5 | 44.7 | 16.1 | 33.1 | 25.7 | 23.5 | 4.1  | 7.7  |

|              |      |      |      |                           |      |      |      |      |
|--------------|------|------|------|---------------------------|------|------|------|------|
| Jordan       | 54.7 | 56.7 | 36.7 | 35.1                      | 42.9 | 38.2 | 15.6 | 13.5 |
| Tunisia      | 28.8 | 44.8 | 24.6 | 37.9                      | 27.5 | 22.8 | 6.5  | 8.6  |
| Yemen        | 40.7 | 47.6 | 36.5 | 43.6                      | 17.2 | 28.8 | 6.3  | 12.5 |
|              |      |      |      | <b>South Asia</b>         |      |      |      |      |
| India        | 20.4 | 36.7 | 14.2 | 19.2                      | 51.4 | 40.8 | 7.3  | 7.8  |
|              |      |      |      | <b>Sub-Saharan Africa</b> |      |      |      |      |
| Angola       | 15.3 | 27.5 | --   | --                        | --   | --   | --   | --   |
| Ghana        | 12.8 | 17.7 | 9.6  | 10.6                      | 20.6 | 12.8 | 2.0  | 1.4  |
| Kenya        | 26.5 | 57.6 | 16.2 | 39.4                      | 9.1  | 26.9 | 1.5  | 10.6 |
| Mozambique   | 10.6 | 18.4 | 3.5  | 11.2                      | 28.7 | 42.9 | 1.0  | 4.8  |
| Senegal      | 21.2 | 50.3 | 14.3 | 36.5                      | 17.9 | 27.7 | 2.6  | 10.1 |
| South Africa | 12.1 | 25.1 | 10.1 | 22.3                      | 20.1 | 19.3 | 2.0  | 4.3  |

**Supplemental Table 4. Gender-specific hypertension awareness, treatment, and control in 2000 in countries with data by world region**

| Country                                | Awareness |       | Treatment |       | Control (among treated) |       | Control (among hypertension) |       |
|----------------------------------------|-----------|-------|-----------|-------|-------------------------|-------|------------------------------|-------|
|                                        | Men       | Women | Men       | Women | Men                     | Women | Men                          | Women |
| <b>High Income Economies</b>           |           |       |           |       |                         |       |                              |       |
| Australia                              | --        | --    | 37.6      | 56.5  | 34.3                    | 46.4  | 12.9                         | 26.2  |
| Czech Republic                         | 63.0      | 73.4  | 44.3      | 60.7  | 37.0                    | 41.8  | 16.4                         | 25.4  |
| Finland                                | 57.5      | 67.6  | 24.7      | 28.5  | 20.5                    | 27.4  | 5.1                          | 7.8   |
| Greece                                 | 50.0      | 69.5  | 45.2      | 61.9  | 50.0                    | 49.3  | 22.6                         | 30.5  |
| Japan                                  | --        | --    | 36.8      | 47.1  | 20.0                    | 24.3  | 7.4                          | 11.5  |
| Korea, Republic of                     | 25.9      | 33.5  | 18.6      | 27.0  | 41.5                    | 51.8  | 7.7                          | 14.0  |
| Portugal                               | 36.7      | 56.1  | 30.6      | 48.1  | 23.4                    | 32.1  | 7.2                          | 15.4  |
| Taiwan                                 | 55.8      | 73.6  | 44.3      | 59.4  | 47.4                    | 48.0  | 21.0                         | 28.5  |
| United Kingdom                         | 40.3      | 52.2  | 25.7      | 38.0  | 31.1                    | 28.2  | 8.0                          | 10.7  |
| United States                          | 66.3      | 71.7  | 54.8      | 62.4  | 59.8                    | 47.8  | 33.0                         | 30.0  |
| <b>East Asia and Pacific</b>           |           |       |           |       |                         |       |                              |       |
| China                                  | 27.2      | 33.1  | 21.6      | 27.7  | 26.2                    | 24.1  | 5.6                          | 6.5   |
| Malaysia                               | 29.4      | 40.6  | 27.3      | 38.1  | 26.9                    | 26.3  | 7.4                          | 10.0  |
| <b>Europe and Central Asia</b>         |           |       |           |       |                         |       |                              |       |
| Turkey                                 | 26.7      | 46.9  | 21.0      | 37.7  | 31.1                    | 17.5  | 6.5                          | 6.6   |
| <b>Latin America and the Caribbean</b> |           |       |           |       |                         |       |                              |       |
| Cuba                                   | 69.3      | 85.8  | 48.1      | 71.6  | 60.1                    | 68.0  | 28.9                         | 48.7  |
| Venezuela                              | --        | --    | 13.1      | 26.0  | 25.2                    | 23.8  | 3.3                          | 6.2   |
| <b>Middle East and North Africa</b>    |           |       |           |       |                         |       |                              |       |
| Morocco                                | 13.5      | 27.3  | 3.6       | 12.3  | 19.4                    | 11.4  | 0.7                          | 1.4   |

---

|              |      |      |      |                           |      |      |      |      |
|--------------|------|------|------|---------------------------|------|------|------|------|
|              |      |      |      | <b>South Asia</b>         |      |      |      |      |
| India        | 20.6 | 27.2 | 16.4 | 22.1                      | 28.0 | 34.4 | 4.6  | 7.6  |
|              |      |      |      | <b>Sub-Saharan Africa</b> |      |      |      |      |
| Cameroon     | --   | --   | 13.0 | 22.6                      | --   | --   | --   | --   |
| Seychelles   | 55.0 | 75.0 | 49.0 | 72.0                      | 24.5 | 41.7 | 12.0 | 30.0 |
| South Africa | 26.0 | 51.0 | 21.0 | 36.0                      | 47.6 | 50.0 | 10.0 | 18.0 |

---

**Supplemental Table 5. Total Population and Hypertension Prevalence Estimates by Country in 2010**

| Country                      | Total 2010 Population,<br>in thousands |       | Crude Prevalence (Standard Error) |             | Data Source                                              |
|------------------------------|----------------------------------------|-------|-----------------------------------|-------------|----------------------------------------------------------|
|                              | Men                                    | Women | Men                               | Women       |                                                          |
| <b>High Income Economies</b> |                                        |       |                                   |             |                                                          |
| Antigua and Barbuda          | 26                                     | 30    | 25.8 (17.4)                       | 24.8 (16.0) | Imputed from the US, Canada, and Puerto Rico             |
| Aruba                        | 34                                     | 39    | 30.2 (18.2)                       | 30.2 (17.3) | Imputed from the US, Canada, and Puerto Rico             |
| Australia                    | 8199                                   | 8454  | 34.8 (0.4)                        | 32.8 (0.3)  | National survey                                          |
| Austria                      | 3200                                   | 3459  | 44.9 (18.4)                       | 38.8 (16.3) | Imputed from the Czech Republic, Germany, and Luxembourg |
| Bahamas                      | 119                                    | 128   | 25.2 (17.1)                       | 25.6 (15.8) | Imputed from the US, Canada, and Puerto Rico             |
| Bahrain                      | 620                                    | 315   | 23.8 (19.9)                       | 27.4 (19.4) | Imputed from Saudi Arabia, Qatar, and Germany            |
| Barbados                     | 101                                    | 105   | 28.1 (17.3)                       | 29.8 (16.3) | Imputed from the US, Canada, and Puerto Rico             |
| Belgium                      | 4087                                   | 4356  | 39.4 (18.1)                       | 35.0 (16.2) | Imputed from the UK, Germany, and Luxembourg             |
| Brunei Darussalam            | 130                                    | 129   | 29.1 (19.2)                       | 32.0 (19.5) | Imputed from Saudi Arabia, Qatar, and Germany            |
| Canada                       | 12900                                  | 13377 | 22.7 (0.9)                        | 23.9 (0.8)  | National Survey                                          |
| Channel Islands              | 62                                     | 64    | 38.6 (18.2)                       | 34.2 (16.2) | Imputed from the Czech Republic, Germany, and the UK     |
| Chile                        | 5791                                   | 6070  | 31.7 (1.0)                        | 28.2 (0.7)  | National Survey                                          |
| Croatia                      | 1626                                   | 1802  | 43.7 (18.7)                       | 38.5 (16.9) | Imputed from Latvia, the Czech Republic, and Germany     |
| Curacao                      | 47                                     | 60    | 32.3 (18.1)                       | 32.5 (17.3) | Imputed from the US, Canada, and Puerto Rico             |
| Cyprus                       | 418                                    | 405   | 34.0 (17.7)                       | 29.5 (14.8) | Imputed from the Czech Republic, Germany, and the UK     |
| Czech Republic               | 4101                                   | 4343  | 48.2 (1.0)                        | 42.6 (0.8)  | Multisite Survey                                         |
| Denmark                      | 2062                                   | 2139  | 39.9 (18.2)                       | 34.6 (16.4) | Imputed from the UK, Germany, and Luxembourg             |
| Equatorial Guinea            | 183                                    | 167   | 28.2 (19.0)                       | 25.2 (17.3) | Imputed from Uruguay, Chile, and Saudi                   |



|                  |       |       |             |             |                                                      |
|------------------|-------|-------|-------------|-------------|------------------------------------------------------|
|                  |       |       |             |             | Arabia                                               |
| Estonia          | 461   | 564   | 45.5 (19.0) | 42.9 (16.9) | Imputed from Latvia, the Czech Republic, and Russia  |
| Finland          | 2010  | 2136  | 54.6 (1.1)  | 46.6 (0.9)  | Multisite Survey                                     |
| France           | 22676 | 25111 | 38.0 (1.6)  | 38.5 (1.2)  | National Survey                                      |
| French Polynesia | 92    | 87    | 30.5 (18.3) | 24.5 (15.7) | Imputed from Australia, New Zealand, and Chile       |
| Germany          | 32745 | 34812 | 35.6 (0.9)  | 34.2 (0.8)  | National Survey                                      |
| Greece           | 4366  | 4583  | 39.2 (17.9) | 36.4 (16.2) | Imputed from the Czech Republic, Germany, and the UK |
| Guam             | 51    | 50    | 30.0 (17.9) | 21.9 (13.7) | Imputed from Korea, Japan, and Singapore             |
| Hong Kong        | 2638  | 3125  | 34.5 (18.2) | 24.7 (14.5) | Imputed from Korea, Japan, and Singapore             |
| Iceland          | 114   | 114   | 36.2 (17.8) | 31.0 (15.3) | Imputed from the Czech Republic, Germany, and the UK |
| Ireland          | 1588  | 1652  | 46.0 (1.2)  | 32.2 (1.1)  | National Survey                                      |
| Israel           | 2339  | 2496  | 33.8 (17.6) | 40.1 (17.2) | Imputed from Saudi Arabia, Qatar, and Germany        |
| Italy            | 23471 | 25592 | 45.7 (0.7)  | 36.5 (0.5)  | Regional Survey                                      |
| Japan            | 50262 | 54114 | 46.7 (1.4)  | 37.5 (0.9)  | National Survey                                      |
| Korea, South     | 18204 | 18952 | 28.6 (0.9)  | 23.5 (0.7)  | National Survey                                      |
| Kuwait           | 1291  | 733   | 24.5 (19.9) | 26.5 (19.7) | Imputed from Saudi Arabia, Qatar, and Germany        |
| Latvia           | 738   | 928   | 44.7 (1.6)  | 36.7 (1.0)  | National Survey                                      |
| Lithuania        | 1068  | 1320  | 43.5 (19.3) | 40.5 (16.7) | Imputed from Latvia, the Czech Republic, and Russia  |
| Luxembourg       | 191   | 197   | 48.5 (1.5)  | 37.1 (1.3)  | National Survey                                      |
| Macao            | 202   | 226   | 29.7 (18.1) | 20.0 (14.0) | Imputed from Korea, Japan, and Singapore             |
| Malta            | 164   | 167   | 43.3 (18.7) | 36.2 (16.6) | Imputed from Latvia, the Czech Republic, and Germany |
| The Netherlands  | 6217  | 6471  | 39.1 (18.3) | 33.8 (16.3) | Imputed from the UK, Germany, and Luxembourg         |
| New Caledonia    | 84    | 83    | 33.3 (18.0) | 27.7 (15.8) | Imputed from Australia, New Zealand, and Chile       |
| New Zealand      | 1521  | 1631  | 36.4 (1.6)  | 30.9 (1.2)  | National Survey                                      |

|                              |        |        |             |             |                                                      |
|------------------------------|--------|--------|-------------|-------------|------------------------------------------------------|
| Norway                       | 1807   | 1842   | 38.2 (18.0) | 33.0 (15.9) | Imputed from the UK, Germany, and Luxembourg         |
| Oman                         | 1110   | 648    | 22.2 (19.9) | 26.2 (19.2) | Imputed from Saudi Arabia, Qatar, and Germany        |
| Poland                       | 14236  | 15742  | 40.9 (18.9) | 35.0 (16.3) | Imputed from Latvia, the Czech Republic, and Germany |
| Portugal                     | 4020   | 4412   | 38.6 (17.9) | 35.7 (16.0) | Imputed from the Czech Republic, Germany, and the UK |
| Puerto Rico                  | 1240   | 1415   | 35.9 (3.2)  | 38.5 (2.5)  | Regional Survey                                      |
| Qatar                        | 1163   | 286    | 26.8 (1.4)  | 36.2 (1.2)  | National Survey                                      |
| Russia                       | 50886  | 62492  | 39.3 (3.9)  | 42.1 (1.7)  | National Survey                                      |
| Saudi Arabia                 | 9946   | 6689   | 25.6 (0.9)  | 27.0 (0.8)  | National Survey                                      |
| Singapore                    | 1876   | 1967   | 25.7 (0.8)  | 22.1 (0.7)  | National Survey                                      |
| Slovak Republic              | 2034   | 2214   | 39.5 (19.0) | 33.7 (16.1) | Imputed from Latvia, the Czech Republic, and Germany |
| Slovenia                     | 817    | 845    | 42.5 (18.9) | 37.2 (16.7) | Imputed from Latvia, the Czech Republic, and Germany |
| Spain                        | 18124  | 18960  | 44.0 (0.6)  | 37.1 (0.5)  | National Survey                                      |
| Sweden                       | 3545   | 3644   | 41.8 (1.3)  | 37.0 (1.2)  | Regional Survey                                      |
| Switzerland                  | 3013   | 3181   | 38.6 (0.7)  | 31.7 (0.7)  | Regional Survey                                      |
| Taiwan                       | 8869   | 8963   | 31.8 (17.9) | 23.6 (14.3) | Imputed from Korea, Japan, and Singapore             |
| Trinidad and Tobago          | 467    | 486    | 26.2 (17.1) | 26.1 (15.5) | Imputed from the US, Canada, and Puerto Rico         |
| United Arab Emirates         | 4976   | 1688   | 17.9 (22.9) | 19.2 (21.9) | Imputed from Saudi Arabia, Qatar, and Germany        |
| United Kingdom               | 22963  | 24348  | 31.7 (0.8)  | 29.9 (0.6)  | 2 National Surveys                                   |
| United States                | 110538 | 117666 | 31.1 (0.6)  | 31.8 (0.5)  | National Survey                                      |
| Uruguay                      | 1104   | 1242   | 37.5 (1.5)  | 38.8 (1.2)  | Regional Survey                                      |
| Virgin Islands               | 36     | 41     | 33.1 (18.2) | 32.6 (17.0) | Imputed from the US, Canada, and Puerto Rico         |
| <b>East Asia and Pacific</b> |        |        |             |             |                                                      |
| Cambodia                     | 3790   | 4318   | 25.5 (18.5) | 24.1 (16.0) | Imputed from Malaysia, China, and Vietnam            |
| China                        | 514137 | 490607 | 35.7 (0.3)  | 32.3 (0.2)  | National Survey                                      |

|                                |       |       |             |             |                                           |
|--------------------------------|-------|-------|-------------|-------------|-------------------------------------------|
| Fiji                           | 268   | 261   | 27.6 (18.3) | 25.0 (16.5) | Imputed from Malaysia, China, and Vietnam |
| Indonesia                      | 73582 | 74522 | 25.0 (18.0) | 24.7 (16.7) | Imputed from Malaysia, Vietnam, and India |
| Kiribati                       | 26    | 28    | 26.0 (18.6) | 23.7 (16.3) | Imputed from Malaysia, China, and Vietnam |
| Korea, North                   | 8100  | 8826  | 34.3 (19.6) | 32.4 (17.2) | Imputed from Malaysia, China, and Vietnam |
| Laos                           | 1573  | 1671  | 25.0 (18.5) | 22.3 (15.9) | Imputed from Malaysia, China, and Vietnam |
| Malaysia                       | 8544  | 9069  | 26.5 (1.3)  | 25.2 (1.0)  | National Survey                           |
| Micronesia                     | 26    | 26    | 25.9 (18.6) | 24.1 (16.1) | Imputed from Malaysia, China, and Vietnam |
| Mongolia                       | 838   | 869   | 37.3 (1.0)  | 30.6 (0.7)  | National Survey                           |
| Myanmar                        | 16019 | 17614 | 24.7 (18.2) | 25.5 (17.0) | Imputed from China, India, and Bangladesh |
| Papua New Guinea               | 1751  | 1730  | 24.7 (18.9) | 21.8 (16.3) | Imputed from Malaysia, China, and Vietnam |
| Philippines                    | 25016 | 25757 | 28.0 (0.7)  | 23.5 (0.6)  | National Survey                           |
| Samoa                          | 49    | 47    | 27.6 (18.3) | 25.6 (16.1) | Imputed from Malaysia, China, and Vietnam |
| Solomon Islands                | 128   | 129   | 25.5 (18.6) | 21.0 (16.2) | Imputed from Malaysia, China, and Vietnam |
| Thailand                       | 23601 | 25204 | 23.4 (0.5)  | 23.8 (0.4)  | National Survey                           |
| Timor-Leste                    | 220   | 215   | 25.5 (18.4) | 23.3 (16.1) | Imputed from Malaysia, China, and Vietnam |
| Tonga                          | 26    | 28    | 27.5 (18.0) | 25.7 (15.9) | Imputed from Malaysia, China, and Vietnam |
| Vanuatu                        | 62    | 62    | 25.9 (18.3) | 22.0 (16.2) | Imputed from Malaysia, China, and Vietnam |
| Vietnam                        | 28501 | 30617 | 22.3 (0.7)  | 19.7 (0.4)  | National Survey                           |
| <b>Europe and Central Asia</b> |       |       |             |             |                                           |
| Albania                        | 1054  | 1070  | 41.6 (0.9)  | 39.4 (3.4)  | National Survey                           |
| Armenia                        | 1034  | 1066  | 41.2 (1.1)  | 43.4 (0.5)  | National Survey                           |
| Azerbaijan                     | 2942  | 3176  | 25.9 (1.7)  | 31.4 (0.5)  | National Survey                           |
| Belarus                        | 3376  | 4099  | 43.9 (19.5) | 45.5 (17.0) | Imputed from Bosnia, Serbia, and Ukraine  |
| Bosnia and Herzegovina         | 1391  | 1508  | 45.6 (1.2)  | 43.2 (1.0)  | National Survey                           |

|                                        |       |       |             |             |                                           |
|----------------------------------------|-------|-------|-------------|-------------|-------------------------------------------|
| Bulgaria                               | 2893  | 3127  | 45.5 (18.9) | 46.5 (17.0) | Imputed from Bosnia, Serbia, and Albania  |
| Georgia                                | 1499  | 1795  | 40.2 (18.7) | 41.0 (16.9) | Imputed from Bosnia, Serbia, and Iran     |
| Hungary                                | 3697  | 4250  | 46.2 (19.2) | 47.4 (17.0) | Imputed from Bosnia, Serbia, and Ukraine  |
| Kazakhstan                             | 4942  | 5643  | 33.9 (19.9) | 33.1 (17.4) | Imputed from China, Mongolia, and Iran    |
| Kyrgyz Republic                        | 1513  | 1620  | 27.2 (19.4) | 27.9 (17.4) | Imputed from China, India, and Iran       |
| Macedonia                              | 783   | 794   | 42.4 (19.3) | 40.1 (17.1) | Imputed from Bosnia, Serbia, and Albania  |
| Moldova                                | 1245  | 1441  | 43.3 (19.5) | 42.2 (17.1) | Imputed from Bosnia, Serbia, and Ukraine  |
| Montenegro                             | 220   | 234   | 43.4 (19.3) | 41.9 (17.0) | Imputed from Bosnia, Serbia, and Albania  |
| Romania                                | 8330  | 8999  | 39.1 (1.5)  | 46.7 (1.3)  | National Survey                           |
| Serbia                                 | 3547  | 3813  | 43.5 (0.6)  | 41.6 (0.5)  | National Survey                           |
| Tajikistan                             | 1993  | 2027  | 26.3 (19.6) | 25.4 (17.7) | Imputed from China, India, and Iran       |
| Turkey                                 | 22426 | 24159 | 38.3 (0.7)  | 35.1 (0.5)  | National Survey                           |
| Turkmenistan                           | 1453  | 1556  | 26.9 (19.1) | 27.8 (17.3) | Imputed from China, Iran, and Azerbaijan  |
| Ukraine                                | 16523 | 20326 | 47.7 (0.9)  | 50.6 (0.6)  | National Survey                           |
| Uzbekistan                             | 8002  | 8341  | 27.1 (19.0) | 27.7 (17.2) | Imputed from China, Iran, and Azerbaijan  |
| <b>Latin America and the Caribbean</b> |       |       |             |             |                                           |
| Argentina                              | 12909 | 14005 | 41.8 (0.9)  | 32.9 (0.9)  | Multisite Survey                          |
| Belize                                 | 82    | 84    | 24.3 (18.2) | 25.1 (16.2) | Imputed from Mexico, Jamaica, and Grenada |
| Bolivia                                | 2640  | 2753  | 27.4 (19.3) | 27.2 (17.8) | Imputed from Ecuador, Venezuela, and Peru |
| Brazil                                 | 62356 | 66587 | 28.1 (1.5)  | 38.5 (1.7)  | 4 Regional Surveys                        |
| Colombia                               | 13812 | 14899 | 28.7 (19.1) | 28.7 (17.9) | Imputed from Argentina, Brazil, and Peru  |
| Costa Rica                             | 1554  | 1522  |             |             | Imputed from Mexico, Jamaica, and Grenada |
| Cuba                                   | 8555  | 4271  | 40.3 (1.8)  | 37.4 (1.4)  | Regional Survey                           |
| Dominican Republic                     | 2929  | 2979  | 27.4 (17.4) | 29.3 (16.3) | Imputed from Mexico, Jamaica, and Grenada |
| Ecuador                                | 4413  | 4517  | 28.5 (18.9) | 28.6 (17.8) | Imputed from Argentina, Brazil, and Peru  |
| El Salvador                            | 1569  | 1928  | 27.1 (17.2) | 30.0 (15.9) | Imputed from Mexico, Jamaica, and Grenada |
| Grenada                                | 32    | 33    | 20.0 (0.9)  | 28.1 (0.8)  | National Survey                           |

|                                     |       |       |             |             |                                           |
|-------------------------------------|-------|-------|-------------|-------------|-------------------------------------------|
| Guatemala                           | 3178  | 3622  | 25.6 (17.6) | 26.5 (15.7) | Imputed from Mexico, Jamaica, and Grenada |
| Guyana                              | 204   | 215   | 26.2 (20.1) | 26.3 (18.3) | Imputed from Argentina, Brazil, and Peru  |
| Haiti                               | 2530  | 2714  | 25.5 (17.9) | 26.7 (15.8) | Imputed from Mexico, Jamaica, and Grenada |
| Honduras                            | 1943  | 2011  | 25.5 (18.1) | 25.7 (15.8) | Imputed from Mexico, Jamaica, and Grenada |
| Jamaica                             | 811   | 868   | 30.4 (1.5)  | 33.6 (1.0)  | National Survey                           |
| Mexico                              | 33224 | 37893 | 29.3 (4.0)  | 28.5 (2.3)  | National Survey                           |
| Nicaragua                           | 1523  | 1625  | 25.4 (18.0) | 26.2 (15.9) | Imputed from Mexico, Jamaica, and Grenada |
| Panama                              | 1142  | 1132  | 27.7 (1.4)  | 24.6 (0.8)  | Regional Survey                           |
| Paraguay                            | 1814  | 1804  | 27.8 (19.1) | 27.2 (17.9) | Imputed from Ecuador, Venezuela, and Peru |
| Peru                                | 8734  | 8869  | 16.2 (1.2)  | 17.8 (1.0)  | Regional Survey                           |
| Saint Lucia                         | 56    | 60    | 29.6 (17.5) | 32.5 (16.6) | Imputed from Mexico, Jamaica, and Grenada |
| Saint Vincent and the Grenadines    | 35    | 35    | 27.9 (17.7) | 30.7 (16.4) | Imputed from Mexico, Jamaica, and Grenada |
| Suriname                            | 164   | 166   | 28.6 (19.1) | 29.4 (17.8) | Imputed from Argentina, Brazil, and Peru  |
| Venezuela                           | 8814  | 8941  | 28.4 (19.0) | 28.2 (17.8) | Imputed from Argentina, Brazil, and Peru  |
| <b>Middle East and North Africa</b> |       |       |             |             |                                           |
| Algeria                             | 11735 | 11595 | 22.3 (1.6)  | 23.0 (1.0)  | Regional Survey                           |
| Djibouti                            | 226   | 227   | 19.8 (16.7) | 22.3 (16.0) | Imputed from Iran, Egypt, and Tunisia     |
| Egypt                               | 22797 | 23157 | 17.1 (0.6)  | 23.9 (0.6)  | National Survey                           |
| Iran                                | 25009 | 24652 | 26.4 (0.3)  | 25.9 (0.3)  | National Survey                           |
| Iraq                                | 7418  | 7496  | 24.8 (19.2) | 23.9 (16.2) | Imputed from Iran, Egypt, and Serbia      |
| Jordan                              | 1808  | 1723  | 29.3 (1.4)  | 26.3 (0.7)  | National Survey                           |
| Lebanon                             | 1490  | 1378  | 30.6 (18.1) | 29.6 (15.7) | Imputed from Iran, Egypt, and Serbia      |
| Libya                               | 1871  | 1820  | 23.4 (17.5) | 23.6 (16.3) | Imputed from Egypt, Tunisia, and Bosnia   |
| Morocco                             | 9367  | 10164 | 33.5 (20.6) | 33.0 (19.5) | Imputed from Ghana, Tunisia, and Bosnia   |
| Syria                               | 5885  | 5710  | 25.7 (18.9) | 23.8 (16.2) | Imputed from Iran, Egypt, and Serbia      |
| Tunisia                             | 3505  | 3661  | 20.9 (0.6)  | 25.2 (0.5)  | National Survey                           |

|                                   |        |        |             |             |                                               |
|-----------------------------------|--------|--------|-------------|-------------|-----------------------------------------------|
| West Bank and Gaza                | 924    | 910    | 24.9 (19.3) | 22.9 (16.3) | Imputed from Iran, Egypt, and Serbia          |
| Yemen                             | 5151   | 5196   | 9.6 (0.4)   | 12.4 (0.4)  | Multisite Survey                              |
| <b>South Asia</b>                 |        |        |             |             |                                               |
| Afghanistan                       | 5772   | 5714   | 18.6 (17.3) | 19.8 (16.5) | Imputed from Bangladesh, India, and Thailand  |
| Bangladesh                        | 44201  | 43208  | 15.2 (0.5)  | 17.4 (0.5)  | National Survey                               |
| Bhutan                            | 238    | 189    | 19.7 (16.9) | 20.4 (16.3) | Imputed from Bangladesh, India, and Thailand  |
| India                             | 371245 | 353796 | 25.8 (0.9)  | 29.2 (1.3)  | 5 National, Regional, and Multisite Surveys   |
| Maldives                          | 95     | 96     | 20.0 (16.8) | 20.2 (16.4) | Imputed from Bangladesh, India, and Thailand  |
| Nepal                             | 6617   | 7434   | 21.6 (16.6) | 22.1 (16.2) | Imputed from Bangladesh, India, and Thailand  |
| Pakistan                          | 47071  | 45245  | 20.1 (16.8) | 21.1 (16.3) | Imputed from Bangladesh, India, and Thailand  |
| Sri Lanka                         | 6719   | 7200   | 23.0 (16.7) | 25.8 (16.6) | Imputed from Bangladesh, India, and Thailand  |
| <b>Sub-Saharan Africa</b>         |        |        |             |             |                                               |
| Angola                            | 3973   | 4169   | 31.1 (1.9)  | 25.2 (1.4)  | Regional Survey                               |
| Benin                             | 2142   | 2219   | 39.9 (23.9) | 40.3 (22.8) | Imputed from Ghana, Kenya, and Senegal        |
| Botswana                          | 535    | 538    | 42.2 (25.0) | 41.0 (22.8) | Imputed from South Africa, Senegal, and Ghana |
| Burkina Faso                      | 3210   | 3491   | 9.0 (1.1)   | 12.4 (1.1)  | Regional Survey                               |
| Burundi                           | 2035   | 2100   | 32.6 (23.5) | 30.8 (21.1) | Imputed from Mozambique, Nigeria, and Uganda  |
| Cameroon                          | 4652   | 4743   | 18.5 (1.6)  | 17.9 (1.3)  | Regional Survey                               |
| Cape Verde                        | 134    | 139    | 40.3 (23.8) | 42.4 (21.8) | Imputed from Ghana, Kenya, and Senegal        |
| Central African Republic          | 1026   | 1086   | 33.6 (22.9) | 33.2 (20.2) | Imputed from Mozambique, Nigeria, and Uganda  |
| Chad                              | 2335   | 2380   | 32.7 (23.4) | 31.3 (20.8) | Imputed from Mozambique, Nigeria, and Uganda  |
| Comoros                           | 164    | 165    | 43.6 (23.9) | 41.5 (22.7) | Imputed from South Africa, Senegal, and Ghana |
| Congo, Democratic Republic of the | 13329  | 13847  | 18.2 (1.4)  | 19.3 (1.2)  | Regional Survey                               |
| Congo, Republic of the            | 975    | 990    | 40.1 (23.5) | 40.3 (22.7) | Imputed from Ghana, Kenya, and Senegal        |

|                       |       |       |             |             |                                               |
|-----------------------|-------|-------|-------------|-------------|-----------------------------------------------|
| Cote d'Ivoire         | 4689  | 4334  | 41.1 (22.8) | 39.9 (23.0) | Imputed from Ghana, Kenya, and Senegal        |
| Eritrea               | 1289  | 1367  | 32.2 (24.4) | 30.5 (21.2) | Imputed from Mozambique, Nigeria, and Uganda  |
| Ethiopia              | 19019 | 19549 | 27.5 (1.1)  | 22.2 (1.5)  | 2 Regional Surveys                            |
| Gabon                 | 395   | 397   | 44.7 (22.9) | 43.6 (21.4) | Imputed from South Africa, Senegal, and Ghana |
| Gambia, The           | 354   | 377   | 33.0 (23.1) | 30.4 (21.3) | Imputed from Mozambique, Nigeria, and Uganda  |
| Ghana                 | 5851  | 6349  | 41.5 (2.8)  | 41.4 (2.8)  | National Survey                               |
| Guinea                | 2506  | 2545  | 40.6 (23.3) | 41.0 (22.5) | Imputed from Ghana, Kenya, and Senegal        |
| Guinea-Bissau         | 371   | 381   | 40.0 (23.6) | 40.3 (22.9) | Imputed from Ghana, Kenya, and Senegal        |
| Kenya                 | 9498  | 9693  | 34.7 (3.6)  | 36.8 (2.6)  | Regional Survey                               |
| Lesotho               | 482   | 527   | 17.5 (0.7)  | 35.0 (0.6)  | National Survey                               |
| Liberia               | 914   | 929   | 39.9 (23.6) | 40.3 (22.7) | Imputed from Ghana, Kenya, and Senegal        |
| Madagascar            | 4754  | 4871  | 33.1 (22.6) | 32.2 (20.5) | Imputed from Mozambique, Nigeria, and Uganda  |
| Malawi                | 3189  | 3260  | 33.4 (23.2) | 32.6 (20.4) | Imputed from Mozambique, Nigeria, and Uganda  |
| Mali                  | 2961  | 3023  | 32.6 (23.4) | 32.1 (20.5) | Imputed from Mozambique, Nigeria, and Uganda  |
| Mauritania            | 881   | 887   | 26.3 (20.2) | 29.5 (18.8) | Imputed from Lesotho, Zambia, and Angola      |
| Mauritius             | 426   | 443   | 49.0 (21.4) | 48.4 (20.1) | Imputed from South Africa, Senegal, and Ghana |
| Mozambique            | 4984  | 5613  | 36.1 (1.5)  | 31.5 (1.0)  | National Survey                               |
| Namibia               | 518   | 586   | 43.2 (24.0) | 41.9 (22.3) | Imputed from South Africa, Senegal, and Ghana |
| Niger                 | 3176  | 3233  | 33.8 (21.8) | 32.4 (20.5) | Imputed from Mozambique, Nigeria, and Uganda  |
| Nigeria               | 36847 | 36185 | 37.2 (2.3)  | 31.4 (1.5)  | Regional Survey                               |
| Rwanda                | 2375  | 2592  | 32.2 (23.8) | 30.4 (21.1) | Imputed from Mozambique, Nigeria, and Uganda  |
| Sao Tome and Principe | 41    | 44    | 25.7 (20.8) | 28.4 (19.0) | Imputed from Lesotho, Zambia, and Angola      |
| Senegal               | 2772  | 3108  | 42.3 (2.2)  | 40.4 (2.2)  | Regional Survey                               |
| Seychelles            | 32    | 31    | 47.0 (22.1) | 46.8 (20.6) | Imputed from South Africa, Senegal, and Ghana |

|              |       |       |             |             |                                               |
|--------------|-------|-------|-------------|-------------|-----------------------------------------------|
| Sierra Leone | 1346  | 1386  | 39.8 (23.9) | 39.7 (23.2) | Imputed from Ghana, Kenya, and Senegal        |
| Somalia      | 1975  | 2055  | 33.5 (22.7) | 32.7 (20.3) | Imputed from Mozambique, Nigeria, and Uganda  |
| South Africa | 14795 | 16380 | 47.0 (5.2)  | 45.9 (3.5)  | National Survey                               |
| South Sudan  | 2266  | 2326  | 26.6 (20.0) | 29.5 (18.7) | Imputed from Lesotho, Zambia, and Angola      |
| Sudan        | 8369  | 8503  | 26.7 (20.2) | 29.1 (18.9) | Imputed from Lesotho, Zambia, and Angola      |
| Swaziland    | 276   | 300   | 42.3 (25.3) | 41.0 (23.0) | Imputed from South Africa, Senegal, and Ghana |
| Tanzania     | 9938  | 10129 | 33.4 (23.1) | 32.3 (20.5) | Imputed from Mozambique, Nigeria, and Uganda  |
| Togo         | 1436  | 1536  | 39.5 (24.2) | 40.1 (23.2) | Imputed from Ghana, Kenya, and Senegal        |
| Uganda       | 6789  | 6824  | 24.6 (2.0)  | 32.7 (2.2)  | Regional Survey                               |
| Zambia       | 2794  | 2816  | 27.2 (1.6)  | 27.4 (1.3)  | Multisite Survey                              |
| Zimbabwe     | 2928  | 3138  | 33.2 (24.6) | 32.0 (21.0) | Imputed from Mozambique, Nigeria, and Uganda  |



**Supplemental Table 6. Total Population and Hypertension Prevalence Estimates by Country in 2000**

| Country                      | Total 2000 Population,<br>in thousands |       | Crude Prevalence (Standard Error) |             | Data Source                                          |
|------------------------------|----------------------------------------|-------|-----------------------------------|-------------|------------------------------------------------------|
|                              | Men                                    | Women | Men                               | Women       |                                                      |
| <b>High Income Economies</b> |                                        |       |                                   |             |                                                      |
| Antigua and Barbuda          | 23                                     | 27    | 28.2 (18.8)                       | 23.7 (15.2) | Imputed from the US, Trinidad, and Chile             |
| Aruba                        | 30                                     | 34    | 30.3 (19.1)                       | 26.3 (16.2) | Imputed from the US, Trinidad, and Chile             |
| Australia                    | 6827                                   | 7103  | 28.9 (0.6)                        | 25.5 (0.4)  | National Survey                                      |
| Austria                      | 2927                                   | 3237  | 42.3 (19.0)                       | 37.1 (15.7) | Imputed from the Czech Republic, the UK, and Norway  |
| Bahamas                      | 87                                     | 95    | 27.0 (18.6)                       | 23.2 (15.2) | Imputed from the US, Trinidad, and Chile             |
| Bahrain                      | 251                                    | 162   | 28.3 (21.5)                       | 22.0 (17.8) | Imputed from Oman, Taiwan, and the Czech Republic    |
| Barbados                     | 92                                     | 97    | 30.7 (18.1)                       | 29.6 (15.5) | Imputed from the US, Trinidad, and Chile             |
| Belgium                      | 3787                                   | 4069  | 43.8 (18.8)                       | 37.9 (15.8) | Imputed from the Czech Republic, the UK, and Norway  |
| Brunei Darussalam            | 102                                    | 101   | 28.8 (21.0)                       | 21.8 (17.7) | Imputed from Oman, Taiwan, and the Czech Republic    |
| Canada                       | 11109                                  | 11608 | 32.5 (18.4)                       | 30.9 (16.0) | Imputed from the US, Trinidad, and Chile             |
| Channel Islands              | 55                                     | 60    | 42.8 (19.0)                       | 34.8 (15.6) | Imputed from the Czech Republic, the UK, and Norway  |
| Chile                        | 4786                                   | 5047  | 28.4 (1.4)                        | 24.7 (1.2)  | Regional Survey                                      |
| Croatia                      | 1606                                   | 1796  | 42.2 (18.9)                       | 36.1 (16.1) | Imputed from the Czech Republic, the UK, and Estonia |
| Curacao                      | 40                                     | 49    | 33.3 (18.9)                       | 30.4 (16.7) | Imputed from the US, Trinidad, and Chile             |
| Cyprus                       | 327                                    | 328   | 40.9 (19.4)                       | 35.4 (16.8) | Imputed from Oman, the Czech Republic, and Estonia   |
| Czech Republic               | 3775                                   | 4105  | 39.7 (1.1)                        | 35.0 (0.8)  | National Survey                                      |
| Denmark                      | 1992                                   | 2081  | 43.3 (19.0)                       | 36.6 (15.9) | Imputed from Oman, the Czech Republic, and Estonia   |
| Equatorial Guinea            | 133                                    | 121   | 29.3 (20.5)                       | 25.0 (17.8) | Imputed from Chile, Oman, and Australia              |
| Estonia                      | 451                                    | 566   | 42.8 (1.5)                        | 35.0 (1.3)  | Regional Survey                                      |
| Finland                      | 1877                                   | 2028  | 52.7 (1.0)                        | 45.4 (0.8)  | Multisite Survey                                     |

|                  |       |       |             |             |                                                      |
|------------------|-------|-------|-------------|-------------|------------------------------------------------------|
| France           | 20887 | 23117 | 43.3 (18.8) | 37.2 (15.7) | Imputed from the Czech Republic, the UK, and Norway  |
| French Polynesia | 72    | 67    | 26.1 (18.2) | 18.0 (13.6) | Imputed from Australia, Taiwan, and Japan            |
| Germany          | 31582 | 34090 | 61.6 (1.1)  | 54.0 (0.9)  | National Survey                                      |
| Greece           | 4175  | 4405  | 25.9 (2.6)  | 26.3 (1.9)  | Regional Survey                                      |
| Guam             | 49    | 47    | 28.3 (18.5) | 19.6 (13.7) | Imputation from Korea, Japan, and Taiwan             |
| Hong Kong        | 2477  | 2714  | 20.1 (1.8)  | 21.2 (1.6)  | National Survey                                      |
| Iceland          | 96    | 98    | 40.0 (18.9) | 30.6 (15.2) | Imputed from the Czech Republic, the UK, and Estonia |
| Ireland          | 1297  | 1351  | 40.7 (19.1) | 32.0 (15.1) | Imputed from the Czech Republic, the UK, and Norway  |
| Israel           | 1826  | 1971  | 35.8 (18.7) | 33.0 (16.5) | Imputed from Oman, Taiwan, and the Czech Republic    |
| Italy            | 21825 | 23947 | 39.9 (0.7)  | 31.3 (0.7)  | National Survey                                      |
| Japan            | 48246 | 51602 | 44.6 (0.9)  | 37.1 (0.6)  | National Survey                                      |
| Korea, South     | 16063 | 16585 | 26.8 (0.8)  | 20.7 (0.6)  | National Survey                                      |
| Kuwait           | 814   | 481   | 29.3 (21.0) | 20.8 (17.9) | Imputed from Oman, Taiwan, and the Czech Republic    |
| Latvia           | 784   | 987   | 42.7 (19.2) | 37.9 (16.2) | Imputed from the Czech Republic, Norway, and Estonia |
| Lithuania        | 1146  | 1391  | 41.9 (19.3) | 35.9 (15.8) | Imputed from the Czech Republic, Norway, and Estonia |
| Luxembourg       | 160   | 169   | 41.8 (19.2) | 35.3 (15.6) | Imputed from the Czech Republic, the UK, and Norway  |
| Macao            | 140   | 159   | 30.9 (19.6) | 19.4 (14.1) | Imputed from Korea, Japan, and Taiwan                |
| Malta            | 143   | 148   | 41.2 (19.6) | 33.5 (16.2) | Imputed from the Czech Republic, the UK, and Norway  |
| The Netherlands  | 5864  | 6124  | 42.0 (19.2) | 35.0 (15.7) | Imputed from the Czech Republic, the UK, and Norway  |
| New Caledonia    | 66    | 65    | 28.3 (17.7) | 20.1 (13.8) | Imputed from Australia, Taiwan, and Japan            |
| New Zealand      | 1303  | 1402  | 32.5 (17.7) | 26.2 (14.7) | Imputed from Australia, Taiwan, and Japan            |
| Norway           | 1626  | 1701  | 46.2 (0.3)  | 38.1 (0.2)  | Regional Survey                                      |
| Oman             | 689   | 446   | 35.8 (0.8)  | 34.3 (0.7)  | National Survey                                      |

|                              |        |        |             |             |                                                         |
|------------------------------|--------|--------|-------------|-------------|---------------------------------------------------------|
| Poland                       | 13083  | 14496  | 31.4 (1.1)  | 34.8 (1.0)  | National Survey                                         |
| Portugal                     | 3762   | 4176   | 49.7 (1.0)  | 44.7 (0.9)  | National Survey                                         |
| Puerto Rico                  | 1211   | 1379   | 32.1 (17.7) | 30.1 (15.7) | Imputed from the US, Trinidad, and Chile                |
| Qatar                        | 281    | 113    | 29.9 (22.3) | 21.7 (18.8) | Imputed from Oman, Taiwan, and the Czech Republic       |
| Russia                       | 48722  | 59182  | 40.9 (19.8) | 35.2 (15.9) | Imputation from Estonia, Norway, and the Czech Republic |
| Saudi Arabia                 | 5959   | 4491   | 28.5 (20.7) | 22.4 (17.1) | Imputed from Oman, Taiwan, and the Czech Republic       |
| Singapore                    | 1392   | 1431   | 30.2 (19.0) | 21.2 (14.4) | Imputed from Korea, Japan, and Taiwan                   |
| Slovak Republic              | 1845   | 2032   | 40.5 (19.7) | 32.3 (15.6) | Imputed from the Czech Republic, Norway, and Estonia    |
| Slovenia                     | 738    | 795    | 41.4 (19.3) | 35.8 (15.6) | Imputed from the Czech Republic, the UK, and Norway     |
| Spain                        | 15320  | 16395  | 42.4 (18.7) | 36.0 (15.2) | Imputed from the Czech Republic, the UK, and Norway     |
| Sweden                       | 3287   | 3443   | 33.6 (1.8)  | 36.1 (1.5)  | Regional Survey                                         |
| Switzerland                  | 2645   | 2856   | 43.1 (19.0) | 36.5 (15.8) | Imputed from the Czech Republic, the UK, and Norway     |
| Taiwan                       | 7794   | 7568   | 23.8 (0.7)  | 16.8 (0.5)  | National Survey                                         |
| Trinidad and Tobago          | 394    | 406    | 32.0 (3.1)  | 26.0 (2.4)  | Regional Survey                                         |
| United Arab Emirates         | 1544   | 518    | 26.3 (22.5) | 18.5 (18.5) | Imputed from Oman, Taiwan, and the Czech Republic       |
| United Kingdom               | 21129  | 22983  | 42.2 (0.6)  | 35.8 (0.5)  | National Survey                                         |
| United States                | 98039  | 105341 | 27.8 (0.9)  | 30.9 (0.8)  | National Survey                                         |
| Uruguay                      | 1061   | 1190   | 31.8 (17.6) | 32.0 (15.4) | Imputed from the US, Trinidad, and Chile                |
| Virgin Islands               | 33     | 38     | 32.8 (18.9) | 29.3 (16.7) | Imputed from the US, Trinidad, and Chile                |
| <b>East Asia and Pacific</b> |        |        |             |             |                                                         |
| Cambodia                     | 2570   | 3010   | 13.0 (1.2)  | 15.1 (0.9)  | Multisite Survey                                        |
| China                        | 433232 | 412516 | 20.8 (0.2)  | 19.2 (0.1)  | National Survey                                         |
| Fiji                         | 220    | 218    | 22.5 (17.5) | 20.4 (15.2) | Imputed from China, Thailand, and Malaysia              |
| Indonesia                    | 60757  | 62145  | 21.3 (1.1)  | 19.2 (1.0)  | Regional Survey                                         |
| Kiribati                     | 20     | 21     | 22.2 (17.8) | 20.4 (15.3) | Imputed from China, Thailand, and Malaysia              |

|                                |       |       |             |             |                                             |
|--------------------------------|-------|-------|-------------|-------------|---------------------------------------------|
| Korea, North                   | 7140  | 7883  | 24.0 (17.7) | 24.7 (15.5) | Imputed from China, Thailand, and Malaysia  |
| Laos                           | 1199  | 1262  | 21.7 (17.3) | 19.8 (14.5) | Imputed from China, Thailand, and Malaysia  |
| Malaysia                       | 6732  | 6571  | 32.5 (0.6)  | 28.6 (0.4)  | National Survey                             |
| Micronesia                     | 25    | 26    | 22.2 (17.5) | 19.7 (14.9) | Imputed from China, Thailand, and Malaysia  |
| Mongolia                       | 639   | 656   | 15.2 (15.1) | 14.9 (13.3) | Imputed from China, India, and Thailand     |
| Myanmar                        | 13577 | 14586 | 22.2 (17.3) | 20.4 (14.9) | Imputed from China, Thailand, and Malaysia  |
| Papua New Guinea               | 1331  | 1308  | 22.2 (18.3) | 19.6 (15.1) | Imputed from China, Indonesia, and Malaysia |
| Philippines                    | 19617 | 19908 | 23.2 (18.2) | 20.9 (15.3) | Imputed from China, Indonesia, and Malaysia |
| Samoa                          | 44    | 42    | 22.6 (17.2) | 21.2 (14.8) | Imputed from China, Thailand, and Malaysia  |
| Solomon Islands                | 99    | 95    | 22.5 (18.0) | 19.5 (15.0) | Imputed from China, Indonesia, and Malaysia |
| Thailand                       | 20119 | 21696 | 17.4 (0.8)  | 16.2 (0.6)  | National Survey                             |
| Timor-Leste                    | 172   | 166   | 22.6 (17.4) | 20.8 (15.4) | Imputed from China, Thailand, and Malaysia  |
| Tonga                          | 24    | 25    | 23.4 (16.9) | 22.9 (14.7) | Imputed from China, Thailand, and Malaysia  |
| Vanuatu                        | 44    | 43    | 22.6 (17.3) | 18.5 (14.8) | Imputed from China, Thailand, and Malaysia  |
| Vietnam                        | 22448 | 24404 | 22.5 (17.4) | 21.9 (14.8) | Imputed from China, Thailand, and Malaysia  |
| <b>Europe and Central Asia</b> |       |       |             |             |                                             |
| Albania                        | 977   | 1004  | 31.7 (18.6) | 39.5 (18.3) | Imputed from Bosnia, Morocco, and Turkey    |
| Armenia                        | 888   | 1095  | 33.6 (18.6) | 43.6 (18.3) | Imputed from Bosnia, Morocco, and Turkey    |
| Azerbaijan                     | 2259  | 2534  | 29.2 (19.3) | 37.2 (19.1) | Imputed from Bosnia, Morocco, and Turkey    |
| Belarus                        | 3318  | 4000  | 33.8 (18.6) | 48.1 (17.7) | Imputed from Bosnia, Morocco, and Turkey    |
| Bosnia and Herzegovina         | 1314  | 1457  | 33.7 (1.3)  | 44.5 (1.1)  | National Survey                             |
| Bulgaria                       | 2975  | 3227  | 36.9 (18.2) | 49.5 (17.6) | Imputed from Bosnia, Morocco, and           |

|                                        |       |       |             |             |                                                    |
|----------------------------------------|-------|-------|-------------|-------------|----------------------------------------------------|
| Georgia                                | 1526  | 1805  | 34.4 (18.3) | 46.5 (17.6) | Turkey<br>Imputed from Bosnia, Morocco, and Turkey |
| Hungary                                | 3644  | 4194  | 37.4 (0.5)  | 37.5 (1.3)  | Regional Survey                                    |
| Kazakhstan                             | 4221  | 4940  | 30.1 (19.0) | 41.2 (18.2) | Imputed from Bosnia, Morocco, and Turkey           |
| Kyrgyz Republic                        | 1297  | 1401  | 28.3 (19.2) | 37.3 (18.6) | Imputed from Bosnia, Morocco, and Turkey           |
| Macedonia                              | 711   | 716   | 33.5 (18.5) | 43.9 (18.0) | Imputed from Bosnia, Morocco, and Turkey           |
| Moldova                                | 1282  | 1485  | 33.0 (18.7) | 45.1 (18.1) | Imputed from Bosnia, Morocco, and Turkey           |
| Montenegro                             | 207   | 224   | 34.3 (18.5) | 45.7 (17.7) | Imputed from Bosnia, Morocco, and Turkey           |
| Romania                                | 7962  | 8629  | 34.7 (18.2) | 46.7 (17.6) | Imputed from Bosnia, Morocco, and Turkey           |
| Serbia                                 | 3578  | 3811  | 35.0 (18.4) | 46.4 (17.7) | Imputed from Bosnia, Morocco, and Turkey           |
| Tajikistan                             | 1404  | 1437  | 27.2 (19.5) | 33.2 (19.3) | Imputed from Bosnia, Morocco, and Turkey           |
| Turkey                                 | 17998 | 19352 | 28.5 (0.9)  | 36.9 (0.8)  | National Survey                                    |
| Turkmenistan                           | 1152  | 1234  | 27.0 (19.4) | 35.2 (19.0) | Imputed from Bosnia, Morocco, and Turkey           |
| Ukraine                                | 16429 | 20246 | 34.6 (18.4) | 49.1 (17.7) | Imputed from Bosnia, Morocco, and Turkey           |
| Uzbekistan                             | 6293  | 6591  | 27.3 (19.5) | 34.9 (19.0) | Imputed from Bosnia, Morocco, and Turkey           |
| <b>Latin America and the Caribbean</b> |       |       |             |             |                                                    |
| Argentina                              | 11183 | 12157 | 39.0 (1.6)  | 27.5 (1.3)  | Regional Survey                                    |
| Belize                                 | 57    | 58    | 25.2 (19.2) | 20.4 (15.0) | Imputed from Mexico, Columbia, and Venezuela       |
| Bolivia                                | 2065  | 2175  | 24.4 (19.0) | 20.0 (15.0) | Imputed from Peru, Argentina, and Ecuador          |
| Brazil                                 | 50789 | 53891 | 36.0 (0.9)  | 33.8 (0.7)  | 5 Regional Surveys                                 |
| Colombia                               | 10973 | 11820 | 14.6 (1.2)  | 14.7 (1.0)  | Regional Survey                                    |
| Costa Rica                             | 1161  | 1138  | 26.1 (18.8) | 21.9 (15.4) | Imputed from Mexico, Columbia, and Venezuela       |
| Cuba                                   | 3975  | 3998  | 24.8 (1.6)  | 26.3 (1.2)  | Regional Survey                                    |

|                                     |        |        |             |             |                                              |
|-------------------------------------|--------|--------|-------------|-------------|----------------------------------------------|
| Dominican Republic                  | 2369   | 2373   | 26.4 (18.8) | 21.1 (15.2) | Imputed from Mexico, Columbia, and Venezuela |
| Ecuador                             | 3444   | 3498   | 7.6 (0.8)   | 12.9 (1.0)  | Regional Survey                              |
| El Salvador                         | 1395   | 1659   | 26.9 (18.9) | 22.8 (18.9) | Imputed from Mexico, Columbia, and Venezuela |
| Grenada                             | 26     | 28     | 26.8 (18.6) | 25.9 (14.9) | Imputed from Mexico, Columbia, and Venezuela |
| Guatemala                           | 2381   | 2630   | 26.3 (19.2) | 20.4 (15.0) | Imputed from Mexico, Columbia, and Venezuela |
| Guyana                              | 207    | 207    | 26.6 (19.2) | 20.2 (15.4) | Imputed from Venezuela, Columbia, and Peru   |
| Haiti                               | 1978   | 2139   | 38.9 (2.7)  | 25.7 (1.3)  | Regional Survey                              |
| Honduras                            | 1423   | 1469   | 25.3 (19.4) | 19.9 (15.0) | Imputed from Mexico, Columbia, and Venezuela |
| Jamaica                             | 726    | 762    | 27.5 (18.4) | 23.6 (15.1) | Imputed from Mexico, Columbia, and Venezuela |
| Mexico                              | 27175  | 30723  | 11.9 (1.0)  | 14.0 (1.0)  | Regional Survey                              |
| Nicaragua                           | 1173   | 1236   | 24.7 (19.6) | 19.7 (15.2) | Imputed from Mexico, Columbia, and Venezuela |
| Panama                              | 893    | 886    | 26.3 (18.8) | 21.9 (15.2) | Imputed from Mexico, Columbia, and Venezuela |
| Paraguay                            | 1368   | 1348   | 24.7 (18.8) | 20.6 (15.1) | Imputed from Argentina, Peru, and Columbia   |
| Peru                                | 7187   | 7278   | 14.5 (1.2)  | 12.8 (1.0)  | Regional Survey                              |
| Saint Lucia                         | 44     | 47     | 27.5 (18.4) | 23.8 (14.9) | Imputed from Mexico, Columbia, and Venezuela |
| Saint Vincent and the Grenadines    | 31     | 31     | 26.5 (18.7) | 23.6 (15.0) | Imputed from Mexico, Columbia, and Venezuela |
| Suriname                            | 139    | 139    | 26.8 (19.1) | 21.9 (15.2) | Imputed from Venezuela, Columbia, and Peru   |
| Venezuela                           | 6817   | 6871   | 47.3 (0.8)  | 32.8 (0.5)  | National Survey                              |
| <b>Middle East and North Africa</b> |        |        |             |             |                                              |
| Algeria                             | 84794  | 84395  | 29.5 (20.6) | 34.8 (20.1) | Imputed from Turkey, Morocco, and Tanzania   |
| Djibouti                            | 1739   | 1744   | 29.1 (20.5) | 34.5 (20.0) | Imputed from Turkey, Morocco, and Tanzania   |
| Egypt                               | 175741 | 178259 | 32.1 (19.7) | 39.6 (19.0) | Imputed from Turkey, Morocco, and Tanzania   |

|                           |        |        |             |             |                                                   |
|---------------------------|--------|--------|-------------|-------------|---------------------------------------------------|
| Iran                      | 173212 | 169386 | 30.6 (20.2) | 35.0 (20.0) | Imputed from Turkey, Morocco, and Tanzania        |
| Iraq                      | 54451  | 55398  | 29.1 (20.7) | 34.3 (20.1) | Imputed from Turkey, Morocco, and Tanzania        |
| Jordan                    | 12282  | 11038  | 28.7 (20.9) | 33.4 (20.4) | Imputed from Turkey, Morocco, and Tanzania        |
| Lebanon                   | 9678   | 10280  | 32.9 (19.3) | 39.0 (19.1) | Imputed from Turkey, Morocco, and Tanzania        |
| Libya                     | 14883  | 13430  | 30.1 (20.3) | 34.2 (20.1) | Imputed from Turkey, Morocco, and Tanzania        |
| Morocco                   | 75808  | 80437  | 29.1 (1.7)  | 36.7 (1.3)  | National Survey                                   |
| Syria                     | 39041  | 38247  | 29.0 (20.8) | 33.3 (20.5) | Imputed from Turkey, Morocco, and Tanzania        |
| Tunisia                   | 28014  | 28509  | 32.3 (19.6) | 37.4 (19.4) | Imputed from Turkey, Morocco, and Tanzania        |
| West Bank and Gaza        | 6746   | 6675   | 28.7 (20.9) | 33.1 (20.5) | Imputed from Turkey, Morocco, and Tanzania        |
| Yemen                     | 34879  | 34832  | 30.6 (20.4) | 35.2 (20.0) | Imputed from Turkey, Morocco, and Tanzania        |
| <b>South Asia</b>         |        |        |             |             |                                                   |
| Afghanistan               | 4181   | 4085   | 18.3 (16.7) | 21.2 (15.8) | Imputed from China, India, and Turkey             |
| Bangladesh                | 35768  | 32961  | 16.5 (14.9) | 15.5 (13.2) | Imputed from China, India, and Thailand           |
| Bhutan                    | 141    | 129    | 16.9 (14.8) | 15.5 (13.2) | Imputed from China, India, and Thailand           |
| India                     | 298654 | 280731 | 14.4 (0.6)  | 18.3 (0.9)  | 5 Regional Surveys                                |
| Maldives                  | 64     | 62     | 17.3 (14.9) | 15.1 (13.3) | Imputed from China, India, and Thailand           |
| Nepal                     | 5560   | 5817   | 16.6 (14.9) | 16.1 (13.3) | Imputed from China, India, and Thailand           |
| Pakistan                  | 35478  | 33126  | 20.9 (16.2) | 23.0 (15.7) | Imputed from China, India, and Turkey             |
| Sri Lanka                 | 5870   | 6048   | 25.2 (17.3) | 24.8 (15.8) | Imputed from India, Indonesia, and Malaysia       |
| <b>Sub-Saharan Africa</b> |        |        |             |             |                                                   |
| Angola                    | 2831   | 2992   | 14.7 (15.6) | 13.1 (13.1) | Imputed from Eritrea, Cameroon, and Ethiopia      |
| Benin                     | 1469   | 1594   | 14.9 (15.6) | 13.9 (13.1) | Imputed from Eritrea, Cameroon, and Ethiopia      |
| Botswana                  | 426    | 445    | 19.3 (17.6) | 24.1 (17.5) | Imputed from South Africa, Zimbabwe, and Cameroon |
| Burkina Faso              | 2286   | 2595   | 33.7 (1.4)  | 36.1 (1.0)  | Regional Survey                                   |

|                                   |       |       |             |             |                                                      |
|-----------------------------------|-------|-------|-------------|-------------|------------------------------------------------------|
| Burundi                           | 1271  | 1347  | 15.3 (15.4) | 14.0 (13.1) | Imputed from Eritrea, Cameroon, and Ethiopia         |
| Cameroon                          | 3421  | 3538  | 16.4(1.5)   | 16.6 (1.0)  | 3 Multisite and Regional Surveys                     |
| Cape Verde                        | 95    | 110   | 36.3 (22.2) | 36.6 (19.7) | Imputed from Seychelles, Burkina Faso, and Tanzania  |
| Central African Republic          | 822   | 880   | 15.8 (15.3) | 15.0 (13.1) | Imputed from Eritrea, Cameroon, and Ethiopia         |
| Chad                              | 1652  | 1712  | 15.3 (15.5) | 13.7 (13.1) | Imputed from Eritrea, Cameroon, and Ethiopia         |
| Comoros                           | 122   | 124   | 35.5 (22.3) | 34.0 (20.5) | Imputed from Seychelles, Burkina Faso, and Tanzania  |
| Congo, Democratic Republic of the | 9897  | 10399 | 15.3 (15.6) | 13.9 (13.1) | Imputed from Eritrea, Cameroon, and Ethiopia         |
| Congo, Republic of the            | 731   | 748   | 15.5 (15.5) | 14.1 (13.0) | Imputed from Eritrea, Cameroon, and Ethiopia         |
| Cote d'Ivoire                     | 4067  | 3555  | 15.8 (15.4) | 13.1 (13.2) | Imputed from Eritrea, Cameroon, and Ethiopia         |
| Eritrea                           | 773   | 836   | 14.3 (1.1)  | 13.3 (0.9)  | National Survey                                      |
| Ethiopia                          | 13894 | 14251 | 14.0 (0.8)  | 10.5 (0.7)  | Regional Survey                                      |
| Gabon                             | 292   | 308   | 22.8 (16.7) | 28.9 (16.8) | Imputation from South Africa, Zimbabwe, and Cameroon |
| Gambia, The                       | 260   | 269   | 15.0 (15.4) | 12.0 (13.1) | Imputed from Eritrea, Cameroon, and Ethiopia         |
| Ghana                             | 4478  | 4494  | 15.3 (15.5) | 13.4 (13.2) | Imputed from Eritrea, Cameroon, and Ethiopia         |
| Guinea                            | 1965  | 2025  | 15.9 (15.4) | 14.5 (13.2) | Imputed from Eritrea, Cameroon, and Ethiopia         |
| Guinea-Bissau                     | 285   | 295   | 15.2 (15.6) | 13.8 (13.2) | Imputed from Eritrea, Cameroon, and Ethiopia         |
| Kenya                             | 6758  | 6960  | 14.6 (15.8) | 12.6 (13.1) | Imputed from Eritrea, Cameroon, and Ethiopia         |
| Lesotho                           | 401   | 472   | 15.7 (15.5) | 15.4 (13.1) | Imputed from Eritrea, Cameroon, and Ethiopia         |
| Liberia                           | 653   | 673   | 15.5 (15.5) | 13.8 (13.1) | Imputed from Eritrea, Cameroon, and Ethiopia         |
| Madagascar                        | 3477  | 3554  | 15.1 (15.5) | 13.1 (13.1) | Imputed from Eritrea, Cameroon, and Ethiopia         |
| Malawi                            | 2428  | 2545  | 15.4 (15.5) | 13.6 (13.1) | Imputed from Eritrea, Cameroon, and Ethiopia         |



|                       |       |       |             |             |                                                     |
|-----------------------|-------|-------|-------------|-------------|-----------------------------------------------------|
| Mali                  | 2125  | 2264  | 15.4 (15.4) | 14.4 (13.1) | Imputed from Eritrea, Cameroon, and Ethiopia        |
| Mauritania            | 619   | 639   | 15.0 (15.6) | 13.9 (13.2) | Imputed from Eritrea, Cameroon, and Ethiopia        |
| Mauritius             | 381   | 396   | 28.8 (19.2) | 27.3 (16.9) | Imputed from Seychelles, South Africa, and Cameroon |
| Mozambique            | 3811  | 4524  | 15.4 (15.4) | 13.6 (13.1) | Imputed from Eritrea, Cameroon, and Ethiopia        |
| Namibia               | 447   | 481   | 27.1 (20.3) | 28.5 (18.6) | Imputed from South Africa, Seychelles, and Zimbabwe |
| Niger                 | 2298  | 2364  | 15.5 (15.5) | 13.6 (13.3) | Imputed from Eritrea, Cameroon, and Ethiopia        |
| Nigeria               | 28100 | 27918 | 15.3 (15.5) | 13.6 (13.2) | Imputed from Eritrea, Cameroon, and Ethiopia        |
| Rwanda                | 1657  | 1801  | 15.0 (15.7) | 12.9 (13.1) | Imputed from Eritrea, Cameroon, and Ethiopia        |
| Sao Tome and Principe | 28    | 31    | 27.0 (19.3) | 24.0 (16.3) | Imputed from Seychelles, South Africa, and Cameroon |
| Senegal               | 2046  | 2247  | 15.4 (15.5) | 13.7 (13.1) | Imputed from Eritrea, Cameroon, and Ethiopia        |
| Seychelles            | 24    | 25    | 41.6 (2.1)  | 35.8 (1.6)  | National Survey                                     |
| Sierra Leone          | 929   | 965   | 15.1 (15.5) | 12.8 (13.2) | Imputed from Eritrea, Cameroon, and Ethiopia        |
| Somalia               | 1548  | 1618  | 15.4 (15.3) | 13.8 (13.1) | Imputed from Eritrea, Cameroon, and Ethiopia        |
| South Africa          | 12140 | 13066 | 23.7 (0.6)  | 24.7 (0.5)  | National Survey                                     |
| South Sudan           | 1478  | 1530  | 15.5 (15.4) | 13.9 (13.2) | Imputed from Eritrea, Cameroon, and Ethiopia        |
| Sudan                 | 6268  | 6350  | 15.2 (15.5) | 13.4 (13.1) | Imputed from Eritrea, Cameroon, and Ethiopia        |
| Swaziland             | 211   | 247   | 28.4 (19.9) | 28.9 (18.6) | Imputed from South Africa, Seychelles, and Zimbabwe |
| Tanzania              | 7383  | 7662  | 33.4 (1.8)  | 35.8 (1.5)  | Multisite Survey                                    |
| Togo                  | 1026  | 1131  | 15.1 (15.5) | 13.5 (13.1) | Imputed from Eritrea, Cameroon, and Ethiopia        |
| Uganda                | 4794  | 4900  | 14.8 (15.6) | 13.2 (13.1) | Imputed from Eritrea, Cameroon, and Ethiopia        |
| Zambia                | 2163  | 2199  | 14.6 (15.8) | 13.0 (13.1) | Imputed from Eritrea, Cameroon, and Ethiopia        |

---

|          |      |      |            |            |                 |
|----------|------|------|------------|------------|-----------------|
| Zimbabwe | 2764 | 2868 | 20.6 (2.3) | 32.9 (2.5) | Regional Survey |
|----------|------|------|------------|------------|-----------------|

---

**Supplemental Table 7. Age-specific and age-adjusted prevalence estimates and absolute numbers of men and women with hypertension in 2010 by world region**

| Age, years | Prevalence % (95% CIs)                  |                   | Absolute Numbers in Millions (95% CIs) |                      |
|------------|-----------------------------------------|-------------------|----------------------------------------|----------------------|
|            | Men                                     | Women             | Men                                    | Women                |
|            | <b>Global</b>                           |                   |                                        |                      |
| 20-29      | 14.5 (11.3, 17.7)                       | 9.4 (6.6, 12.3)   | 87.1 (67.7, 106.5)                     | 54.4 (37.9, 70.8)    |
| 30-39      | 21.4 (17.7, 25.1)                       | 15.9 (12.5, 19.3) | 107.6 (89.1, 126.1)                    | 77.8 (61.0, 94.6)    |
| 40-49      | 31.2 (27.3, 35.1)                       | 28.8 (24.9, 32.7) | 137.0 (119.9, 154.1)                   | 124.4 (107.4, 141.4) |
| 50-59      | 44.4 (40.4, 48.4)                       | 45.6 (41.4, 49.7) | 146.5 (133.3, 159.8)                   | 151.6 (137.8, 165.5) |
| 60-69      | 57.0 (53.1, 60.8)                       | 61.6 (57.5, 65.7) | 112.8 (105.2, 120.4)                   | 131.4 (122.5, 140.2) |
| ≥70        | 68.6 (65.1, 72.1)                       | 75.8 (72.5, 79.1) | 103.4 (98.2, 108.7)                    | 153.9 (147.2, 160.6) |
| Total      | 31.9 (30.3, 33.5)                       | 30.1 (28.5, 31.6) | 694.4 (658.7, 730.1)                   | 693.5 (659.5, 727.5) |
|            | <b>High-Income Economies</b>            |                   |                                        |                      |
| 20-29      | 10.7 (5.9, 15.5)                        | 4.3 (1.9, 6.6)    | 10.0 (5.5, 14.4)                       | 3.7 (1.7, 5.8)       |
| 30-39      | 18.5 (14.1, 22.9)                       | 9.1 (6.3, 12.0)   | 17.4 (13.3, 21.5)                      | 8.2 (5.6, 10.8)      |
| 40-49      | 31.0 (26.8, 35.3)                       | 22.0 (18.5, 25.5) | 29.0 (25.0, 33.0)                      | 20.5 (17.2, 23.8)    |
| 50-59      | 48.5 (43.6, 53.4)                       | 41.0 (36.3, 45.7) | 40.4 (36.3, 44.5)                      | 35.9 (31.8, 40.1)    |
| 60-69      | 60.8 (56.8, 64.8)                       | 60.9 (56.7, 65.0) | 36.4 (34.0, 38.8)                      | 40.8 (38.0, 43.5)    |
| ≥70        | 73.6 (70.0, 77.3)                       | 77.5 (73.9, 81.0) | 41.1 (39.0, 43.1)                      | 65.5 (62.5, 68.4)    |
| Total      | 31.6 (29.6, 33.6)                       | 25.3 (23.9, 26.7) | 174.2 (165.3, 183.2)                   | 174.7 (167.2, 182.1) |
|            | <b>Low- and Middle-income Economies</b> |                   |                                        |                      |
| 20-29      | 15.2 (11.5, 18.9)                       | 10.4 (7.0, 13.7)  | 77.1 (58.3, 96.0)                      | 50.6 (34.3, 66.9)    |
| 30-39      | 22.1 (17.7, 26.5)                       | 17.4 (13.3, 21.6) | 90.2 (72.2, 108.3)                     | 69.6 (53.0, 86.2)    |
| 40-49      | 31.2 (26.4, 36.0)                       | 30.6 (25.7, 35.6) | 108.0 (91.4, 124.6)                    | 103.9 (87.3, 120.6)  |
| 50-59      | 43.0 (37.9, 48.1)                       | 47.2 (41.8, 52.6) | 106.1 (93.5, 118.7)                    | 115.7 (102.5, 128.9) |
| 60-69      | 55.3 (50.1, 60.6)                       | 61.9 (56.2, 67.7) | 76.4 (69.1, 83.6)                      | 90.6 (82.2, 99.0)    |

|                                        |                   |                   |                      |                      |
|----------------------------------------|-------------------|-------------------|----------------------|----------------------|
| ≥70                                    | 65.6 (60.6, 70.7) | 74.7 (69.6, 79.7) | 62.4 (57.5, 67.2)    | 88.5 (82.5, 94.5)    |
| Total                                  | 31.7 (29.7, 33.6) | 31.2 (29.3, 33.1) | 520.1 (485.6, 554.7) | 518.8 (485.7, 552.0) |
| <b>East Asia and Pacific</b>           |                   |                   |                      |                      |
| 20-29                                  | 13.9 (6.5, 21.4)  | 7.6 (0.6, 14.5)   | 24.9 (11.6, 38.3)    | 12.9 (1.1, 24.6)     |
| 30-39                                  | 23.5 (14.1, 32.9) | 14.7 (6.0, 23.5)  | 36.8 (22.1, 51.5)    | 22.4 (9.2, 35.7)     |
| 40-49                                  | 34.0 (25.1, 43.0) | 29.7 (20.5, 38.8) | 52.6 (38.7, 66.5)    | 44.1 (30.6, 57.7)    |
| 50-59                                  | 46.6 (37.4, 55.8) | 47.8 (38.3, 57.2) | 51.6 (41.5, 61.8)    | 50.6 (40.6, 60.6)    |
| 60-69                                  | 59.1 (50.5, 67.6) | 62.5 (53.1, 71.9) | 36.5 (31.3, 41.8)    | 38.9 (33.1, 44.8)    |
| ≥70                                    | 68.4 (61.2, 75.7) | 72.4 (64.8, 80.1) | 29.9 (26.8, 33.1)    | 38.1 (34.1, 42.2)    |
| Total                                  | 33.3 (29.5, 37.0) | 29.6 (26.0, 33.3) | 232.4 (205.4, 259.4) | 207.1 (181.6, 232.5) |
| <b>Europe and Central Asia</b>         |                   |                   |                      |                      |
| 20-29                                  | 17.2 (6.6, 25.6)  | 9.2 (0.7, 17.8)   | 4.0 (1.5, 5.9)       | 2.1 (0.2, 4.1)       |
| 30-39                                  | 27.9 (16.6, 38.1) | 19.0 (9.0, 29.0)  | 5.5 (3.3, 7.5)       | 3.8 (1.8, 5.8)       |
| 40-49                                  | 41.0 (28.7, 53.9) | 37.0 (24.9, 49.2) | 6.9 (4.8, 9.1)       | 6.6 (4.4, 8.8)       |
| 50-59                                  | 54.0 (41.9, 67.5) | 56.9 (45.2, 68.7) | 7.6 (5.9, 9.5)       | 9.3 (7.4, 11.2)      |
| 60-69                                  | 66.9 (55.7, 80.7) | 73.8 (63.1, 84.6) | 5.2 (4.4, 6.3)       | 7.4 (6.3, 8.5)       |
| ≥70                                    | 77.4 (67.8, 92.3) | 86.7 (78.0, 95.5) | 5.5 (4.9, 6.6)       | 10.6 (9.5, 11.7)     |
| Total                                  | 39.0 (34.0, 44.0) | 36.0 (31.5, 40.5) | 34.8 (30.4, 39.2)    | 39.8 (35.5, 44.1)    |
| <b>Latin America and the Caribbean</b> |                   |                   |                      |                      |
| 20-29                                  | 16.1 (7.2, 25.1)  | 12.8 (5.6, 20.0)  | 7.9 (3.5, 12.3)      | 6.3 (2.8, 9.9)       |
| 30-39                                  | 21.4 (12.4, 30.4) | 19.5 (11.4, 27.6) | 8.8 (5.1, 12.5)      | 8.4 (4.9, 11.8)      |
| 40-49                                  | 28.3 (17.8, 38.8) | 33.6 (23.4, 43.7) | 9.2 (5.8, 12.7)      | 11.9 (8.3, 15.5)     |
| 50-59                                  | 41.8 (30.1, 53.4) | 46.9 (34.9, 58.8) | 9.8 (7.0, 12.5)      | 12.1 (9.0, 15.2)     |
| 60-69                                  | 53.0 (41.4, 64.6) | 61.0 (49.3, 72.6) | 7.4 (5.8, 9.0)       | 9.7 (7.8, 11.6)      |
| ≥70                                    | 60.2 (48.3, 72.1) | 73.9 (63.1, 84.8) | 6.3 (5.1, 7.6)       | 10.4 (8.9, 12.0)     |
| Total                                  | 30.4 (26.0, 34.7) | 32.7 (28.7, 36.6) | 49.4 (41.9, 57.0)    | 58.8 (51.6, 66.1)    |

| <b>Middle East and North Africa</b> |                   |                   |                     |                      |
|-------------------------------------|-------------------|-------------------|---------------------|----------------------|
| 20-29                               | 10.8 (0.9, 20.8)  | 8.0 (-0.8, 16.7)  | 3.6 (0.3, 7.0)      | 2.6 (-0.3, 5.5)      |
| 30-39                               | 15.4 (3.6, 27.3)  | 13.7 (2.4, 24.9)  | 3.6 (0.8, 6.3)      | 3.1 (0.6, 5.7)       |
| 40-49                               | 24.2 (11.0, 37.4) | 25.7 (12.1, 39.3) | 4.3 (1.9, 6.6)      | 4.5 (2.1, 6.8)       |
| 50-59                               | 37.9 (23.8, 51.9) | 45.9 (31.5, 60.3) | 4.5 (2.9, 6.2)      | 5.5 (3.8, 7.3)       |
| 60-69                               | 52.6 (39.5, 65.6) | 61.3 (48.6, 74.0) | 3.3 (2.5, 4.2)      | 4.2 (3.3, 5.1)       |
| ≥70                                 | 70.1 (57.7, 82.4) | 78.3 (65.7, 90.8) | 3.2 (2.6, 3.8)      | 4.2 (3.6, 4.9)       |
| Total                               | 27.0 (21.8, 32.2) | 28.8 (23.7, 33.8) | 22.5 (17.2, 27.8)   | 24.2 (19.2, 29.2)    |
| <b>South Asia</b>                   |                   |                   |                     |                      |
| 20-29                               | 12.4 (5.5, 19.4)  | 10.1 (3.7, 16.4)  | 18.5 (8.2, 28.8)    | 14.1 (5.2, 23.0)     |
| 30-39                               | 18.1 (11.2, 25.0) | 17.4 (10.4, 24.4) | 21.3 (13.1, 29.4)   | 19.4 (11.6, 27.2)    |
| 40-49                               | 25.9 (17.8, 33.9) | 28.7 (19.6, 37.9) | 23.9 (16.4, 31.3)   | 24.9 (17.0, 32.9)    |
| 50-59                               | 35.4 (26.0, 44.9) | 42.9 (31.0, 54.8) | 23.3 (17.0, 29.5)   | 26.7 (19.3, 34.0)    |
| 60-69                               | 45.7 (33.5, 57.9) | 57.6 (43.0, 72.2) | 16.3 (11.9, 20.6)   | 21.3 (15.9, 26.7)    |
| ≥70                                 | 58.6 (44.1, 73.1) | 73.7 (58.3, 89.1) | 13.0 (9.8, 16.3)    | 18.7 (14.8, 22.6)    |
| Total                               | 26.4 (22.9, 30.0) | 29.6 (25.8, 33.5) | 116.2 (99.0, 133.4) | 125.1 (107.8, 142.5) |
| <b>Sub-Saharan Africa</b>           |                   |                   |                     |                      |
| 20-29                               | 24.6 (16.7, 32.5) | 17.1 (10.3, 23.8) | 18.2 (12.3, 24.)    | 12.6 (7.6, 17.5)     |
| 30-39                               | 28.3 (20.2, 36.5) | 25 (17.3, 32.8)   | 14.3 (10.2, 18.3)   | 12.5 (8.6, 16.4)     |
| 40-49                               | 34.9 (26.5, 43.3) | 36.2 (27.9, 44.6) | 11.2 (8.5, 13.9)    | 11.9 (9.2, 14.7)     |
| 50-59                               | 44.6 (35.9, 53.3) | 50.6 (42.2, 59.1) | 9.3 (7.5, 11.1)     | 11.5 (9.6, 13.4)     |
| 60-69                               | 61.2 (52.1, 70.4) | 63.7 (55.3, 72.1) | 7.6 (6.5, 8.8)      | 9.0 (7.8, 10.2)      |
| ≥70                                 | 63.6 (53.8, 73.5) | 73.2 (65.5, 80.8) | 4.3 (3.6, 5.0)      | 6.3 (5.7, 7.0)       |
| Total                               | 36.9 (33.2, 40.5) | 36.3 (32.9, 39.6) | 64.8 (56.8, 72.8)   | 63.8 (56.6, 71.1)    |

**Supplemental Table 8. Age-specific and age-adjusted prevalence estimates and absolute numbers of men and women with hypertension in 2000 by world region**

| Age, years | Prevalence % (95% CIs)                  |                   | Absolute Numbers in Millions (95% CIs) |                      |
|------------|-----------------------------------------|-------------------|----------------------------------------|----------------------|
|            | Men                                     | Women             | Men                                    | Women                |
|            | <b>Global</b>                           |                   |                                        |                      |
| 20-29      | 9.9 (6.4, 13.4)                         | 5.4 (2.7, 8.1)    | 51.3 (33.3, 69.4)                      | 27.0 (13.7, 40.4)    |
| 30-39      | 15.4 (11.6, 19.2)                       | 10.2 (7.1, 13.4)  | 70.7 (53.3, 88.1)                      | 45.5 (31.4, 59.6)    |
| 40-49      | 25.6 (20.8, 30.3)                       | 23.1 (18.4, 27.9) | 91.4 (74.3, 108.5)                     | 80.7 (64.2, 97.2)    |
| 50-59      | 38.0 (33.1, 42.9)                       | 40.3 (35.0, 45.6) | 89.0 (77.5, 100.5)                     | 95.8 (83.2, 108.3)   |
| 60-69      | 51.6 (46.1, 57.1)                       | 56.5 (50.0, 62.9) | 84.0 (75.1, 93.0)                      | 99.9 (88.5, 111.3)   |
| ≥70        | 63.1 (57.9, 68.2)                       | 72.8 (66.8, 78.9) | 70.6 (64.8, 76.3)                      | 115.2 (105.6, 124.8) |
| Total      | 26.4 (24.6, 28.2)                       | 25.1 (23.4, 26.9) | 457.0 (422.9, 491.2)                   | 464.1 (432.0, 496.2) |
|            | <b>High-Income Economies</b>            |                   |                                        |                      |
| 20-29      | 16.3 (5.1, 27.6)                        | 5.5 (-1.1, 12.1)  | 14.4 (4.5, 24.3)                       | 4.7 (-0.9, 10.2)     |
| 30-39      | 22.5 (11.1, 33.9)                       | 9.8 (2.2, 17.4)   | 21.1 (10.4, 31.8)                      | 9.0 (2.1, 15.9)      |
| 40-49      | 35.1 (20.9, 49.2)                       | 23.7 (10.6, 36.8) | 30.8 (18.4, 43.3)                      | 21.0 (9.4, 32.6)     |
| 50-59      | 49.3 (37.6, 60.9)                       | 44.2 (31.4, 57.1) | 33.1 (25.3, 41.0)                      | 31.1 (22.1, 40.1)    |
| 60-69      | 63.7 (50.9, 76.4)                       | 62.8 (47.1, 78.5) | 32.1 (25.7, 38.6)                      | 36.6 (27.5, 45.8)    |
| ≥70        | 72.7 (63.1, 82.4)                       | 80.1 (68.8, 91.4) | 31.2 (27.1, 35.4)                      | 57.1 (49.0, 65.2)    |
| Total      | 35.1 (29.8, 40.3)                       | 26.9 (22.6, 31.3) | 162.8 (140.7, 184.9)                   | 159.5 (138.4, 180.6) |
|            | <b>Low- and Middle-Income Economies</b> |                   |                                        |                      |
| 20-29      | 8.6 (5.1, 12.1)                         | 5.4 (2.5, 8.3)    | 36.9 (21.8, 52.0)                      | 22.4 (10.2, 34.5)    |
| 30-39      | 13.6 (9.8, 17.4)                        | 10.4 (6.9, 13.8)  | 49.6 (35.9, 63.4)                      | 36.5 (24.3, 48.8)    |
| 40-49      | 22.5 (18.1, 26.8)                       | 22.9 (18.4, 27.4) | 60.6 (48.9, 72.3)                      | 59.7 (48.0, 71.4)    |
| 50-59      | 33.5 (28.4, 38.5)                       | 38.6 (33.4, 43.9) | 55.9 (47.5, 64.2)                      | 64.7 (55.9, 73.4)    |
| 60-69      | 46.2 (40.6, 51.7)                       | 53.3 (47.6, 59.1) | 51.9 (45.7, 58.1)                      | 63.2 (56.5, 70.0)    |

|                                        |                   |                    |                      |                      |
|----------------------------------------|-------------------|--------------------|----------------------|----------------------|
| ≥70                                    | 57.0 (51.2, 62.8) | 66.9 (60.9, 72.8)  | 39.4 (35.4, 43.4)    | 58.1 (53.0, 63.2)    |
| Total                                  | 23.4 (21.6, 25.2) | 24.1 (22.4, 25.9)  | 294.3 (268.2, 320.3) | 304.6 (280.5, 328.8) |
| <b>East Asia and Pacific</b>           |                   |                    |                      |                      |
| 20-29                                  | 7.8 (3.7, 11.8)   | 3.3 (0.3, 6.2)     | 12.5 (5.9, 19.1)     | 5.1 (0.5, 9.6)       |
| 30-39                                  | 13.5 (9.3, 17.7)  | 7.7 (4.0, 11.4)    | 21.5 (14.8, 28.2)    | 11.8 (6.1, 17.4)     |
| 40-49                                  | 22.7 (17.9, 27.5) | 20.4 (15.3, 25.6)  | 26.6 (21.0, 32.3)    | 22.6 (16.9, 28.3)    |
| 50-59                                  | 33.5 (28.9, 38.1) | 36.1 (30.9, 41.4)  | 24.0 (20.7, 27.3)    | 25.1 (21.4, 28.7)    |
| 60-69                                  | 46.5 (42.0, 51.1) | 49.2 (43.6, 54.8)  | 23.1 (20.8, 25.3)    | 24.5 (21.7, 27.3)    |
| ≥70                                    | 53.9 (49.0, 58.8) | 59.0 (52.6, 65.4)  | 16.6 (15.1, 18.1)    | 23.0 (20.5, 25.5)    |
| Total                                  | 23.0 (21.1, 24.9) | 21.1 (19.3, 23.0)  | 124.4 (112.6, 136.1) | 112.0 (101.4, 122.6) |
| <b>Europe and Central Asia</b>         |                   |                    |                      |                      |
| 20-29                                  | 13.7 (-2.7, 30.1) | 12.1 (-3.6, 27.7)  | 2.9 (-0.6, 6.3)      | 2.5 (-0.7, 5.8)      |
| 30-39                                  | 20.0 (0.2, 39.7)  | 22.1 (1.7, 42.4)   | 3.6 (0.0, 7.1)       | 4.1 (0.3, 7.8)       |
| 40-49                                  | 33.0 (7.4, 58.7)  | 43.6 (16.5, 70.8)  | 5.3 (1.2, 9.4)       | 7.6 (2.9, 12.3)      |
| 50-59                                  | 45.3 (17.7, 72.9) | 64.8 (37.2, 92.3)  | 4.5 (1.8, 7.3)       | 7.4 (4.2, 10.5)      |
| 60-69                                  | 58.6 (29.5, 87.8) | 76.1 (48.5, 103.7) | 5.3 (2.6, 7.9)       | 8.5 (5.4, 11.6)      |
| ≥70                                    | 69.5 (41.3, 97.7) | 79.7 (51.0, 108.5) | 3.9 (2.3, 5.4)       | 8.1 (5.2, 11.0)      |
| Total                                  | 32.1 (22.5, 41.7) | 39.5 (29.8, 49.2)  | 25.4 (17.8, 33.1)    | 38.1 (29.5, 46.8)    |
| <b>Latin America and the Caribbean</b> |                   |                    |                      |                      |
| 20-29                                  | 12.4 (9.1, 15.8)  | 5.9 (3.8, 8.0)     | 5.5 (4.0, 6.9)       | 2.6 (1.7, 3.6)       |
| 30-39                                  | 18.2 (15.4, 21.0) | 11.8 (9.6, 14.0)   | 6.3 (5.4, 7.3)       | 4.4 (3.5, 5.2)       |
| 40-49                                  | 29.5 (26.0, 33.0) | 25.6 (22.2, 29.0)  | 7.6 (6.7, 8.5)       | 7.0 (6.1, 7.9)       |
| 50-59                                  | 46.2 (41.7, 50.7) | 43.0 (38.7, 47.3)  | 7.6 (6.9, 8.3)       | 7.6 (6.9, 8.4)       |
| 60-69                                  | 55.3 (49.9, 60.7) | 56.6 (51.5, 61.7)  | 5.7 (5.2, 6.3)       | 6.7 (6.1, 7.3)       |
| ≥70                                    | 65.2 (60.1, 70.2) | 78.8 (74.5, 83.2)  | 5.0 (4.6, 5.4)       | 8.0 (7.5, 8.4)       |
| Total                                  | 30.2 (28.6, 31.7) | 27.0 (25.7, 28.3)  | 37.7 (35.5, 39.9)    | 36.3 (34.4, 38.2)    |

| <b>Middle East and North Africa</b> |                    |                    |                   |                   |
|-------------------------------------|--------------------|--------------------|-------------------|-------------------|
| 20-29                               | 17.2 (-10.7, 45.1) | 15.9 (-10.9, 42.7) | 4.3 (-2.7, 11.2)  | 3.8 (-2.6, 10.3)  |
| 30-39                               | 23.1 (-8.5, 54.7)  | 24.7 (-7.1, 56.6)  | 4.1 (-1.5, 9.6)   | 4.3 (-1.2, 9.9)   |
| 40-49                               | 36.1 (-1.0, 73.2)  | 44.4 (6.4, 82.3)   | 4.6 (-0.1, 9.4)   | 5.6 (0.8, 10.4)   |
| 50-59                               | 45.2 (5.0, 85.4)   | 63.8 (24.7, 102.9) | 3.4 (0.4, 6.4)    | 4.9 (1.9, 7.9)    |
| 60-69                               | 59.9 (21.1, 98.7)  | 74.7 (40.3, 109.2) | 3.1 (1.1, 5.1)    | 4.1 (2.2, 6.0)    |
| ≥70                                 | 69.9 (33.8, 106.0) | 78.7 (45.8, 111.7) | 2.3 (1.1, 3.5)    | 3.1 (1.8, 4.4)    |
| Total                               | 34.5 (19.9, 49.0)  | 40.9 (26.6, 55.2)  | 21.7 (10.9, 32.5) | 25.9 (15.4, 36.3) |
| <b>South Asia</b>                   |                    |                    |                   |                   |
| 20-29                               | 5.3 (-1.8, 12.5)   | 4.3 (-1.7, 10.3)   | 6.6 (-2.2, 15.4)  | 4.9 (-2.0, 11.8)  |
| 30-39                               | 9.6 (0.8, 18.3)    | 9.2 (1.0, 17.4)    | 9.4 (0.8, 18.0)   | 8.3 (0.9, 15.7)   |
| 40-49                               | 16.0 (6.5, 25.5)   | 18.7 (8.7, 28.6)   | 11.7 (4.8, 18.7)  | 12.4 (5.8, 19.1)  |
| 50-59                               | 26.0 (13.6, 38.4)  | 33.4 (20.3, 46.4)  | 11.7 (6.1, 17.3)  | 14.6 (8.9, 20.3)  |
| 60-69                               | 38.8 (24.1, 53.6)  | 51.2 (36.3, 66.2)  | 11.2 (6.9, 15.4)  | 15.1 (10.7, 19.5) |
| ≥70                                 | 53.4 (35.9, 71.0)  | 69.0 (52.5, 85.4)  | 8.9 (6.0, 11.9)   | 12.1 (9.2, 14.9)  |
| Total                               | 18.3 (14.1, 22.5)  | 21.9 (17.8, 26.0)  | 59.5 (43.5, 75.6) | 67.4 (53.0, 81.8) |
| <b>Sub-Saharan Africa</b>           |                    |                    |                   |                   |
| 20-29                               | 9.4 (-2.7, 21.5)   | 6.2 (-3.0, 15.4)   | 5.2 (-1.5, 11.9)  | 3.4 (-1.7, 8.5)   |
| 30-39                               | 13.0 (-0.9, 26.8)  | 9.9 (-1.4, 21.2)   | 4.7 (-0.3, 9.8)   | 3.7 (-0.5, 7.8)   |
| 40-49                               | 19.2 (2.6, 35.8)   | 17.5 (2.9, 32.2)   | 4.7 (0.7, 8.8)    | 4.5 (0.7, 8.3)    |
| 50-59                               | 28.3 (8.3, 48.3)   | 29.4 (10.2, 48.5)  | 4.6 (1.4, 7.9)    | 5.1 (1.8, 8.5)    |
| 60-69                               | 37.2 (15.7, 58.7)  | 40.5 (19.3, 61.7)  | 3.6 (1.5, 5.6)    | 4.4 (2.1, 6.7)    |
| ≥70                                 | 53.4 (32.5, 74.2)  | 62.4 (42.7, 82.1)  | 2.7 (1.6, 3.7)    | 3.8 (2.6, 5.1)    |
| Total                               | 20.9 (14.2, 27.7)  | 20.3 (14.4, 26.2)  | 25.5 (15.3, 35.7) | 24.9 (16.3, 33.6) |



**Supplemental Table 9. Sensitivity analysis of age-standardized prevalence estimates and absolute numbers of men and women with hypertension worldwide and in high-income and low- and middle-income countries in 2000 and 2010 using only countries with data for both 2000 and 2010**

| Age, years                              | Prevalence % (95% CIs) |                   | Absolute Numbers in Millions (95% CIs) |                            |
|-----------------------------------------|------------------------|-------------------|----------------------------------------|----------------------------|
|                                         | 2000                   | 2010              | 2000                                   | 2010                       |
| <b>Worldwide</b>                        |                        |                   |                                        |                            |
| Overall                                 | 25.9 (24.4, 27.5)      | 30.8 (29.2, 32.5) | 924.2 (868.0, 980.5)                   | 1,377.9 (1,305.6, 1,450.2) |
| Men                                     | 26.6 (24.4, 28.8)      | 32.1 (29.7, 34.4) | 461.2 (420.2, 502.2)                   | 697.5 (645.0, 750.1)       |
| Women                                   | 25.1 (23.0, 27.2)      | 29.5 (27.3, 31.7) | 463.0 (424.6, 501.5)                   | 680.3 (630.7, 729.9)       |
| <b>High-Income Countries</b>            |                        |                   |                                        |                            |
| Overall                                 | 33.4 (29.6, 37.3)      | 28.1 (24.7, 31.6) | 343.1 (309.6, 376.5)                   | 345.6 (312.0, 379.3)       |
| Men                                     | 37.6 (31.8, 43.3)      | 31.7 (26.5, 36.9) | 173.6 (149.9, 197.4)                   | 174.9 (151.1, 198.7)       |
| Women                                   | 29.1 (23.9, 34.2)      | 24.5 (20.0, 28.9) | 169.4 (145.9, 193.0)                   | 170.7 (146.9, 194.6)       |
| <b>Low- and Middle-Income Countries</b> |                        |                   |                                        |                            |
| Overall                                 | 23.2 (21.6, 24.8)      | 31.3 (29.5, 33.1) | 581.1 (535.9, 626.3)                   | 1,032.3 (968.3, 1,096.2)   |
| Men                                     | 22.9 (20.6, 25.2)      | 31.8 (29.2, 34.4) | 287.5 (254.1, 321.0)                   | 522.6 (475.8, 569.5)       |
| Women                                   | 23.3 (21.1, 25.5)      | 30.6 (28.1, 33.1) | 293.6 (263.2, 324.0)                   | 509.6 (466.1, 553.1)       |

## Supplemental References

- 1 Kearney PM, Whelton M, Reynolds K, Muntner P, Whelton PK, He J. Global burden of hypertension: analysis of worldwide data. *Lancet*. 2005;**365**:217–223.
- 2 World Health Organization Chronic Disease and Health Promotion. WHO Global Infobase, <https://apps.who.int/infobase/Index.aspx> (last accessed September 2014).
- 3 O'Brien E, Pickering T, Asmar R, Myers M, Parati G, Staessen J, Mengden T, Imai Y, Waeber B, Palatini P, Gerin W; Working Group on Blood Pressure Monitoring of the European Society of Hypertension. Working Group on Blood Pressure Monitoring of the European Society of Hypertension International Protocol for validation of blood pressure measuring devices in adults. *Blood Press Monit*. 2002;**7**:3–17.
- 4 O'Brien E, Petrie J, Littler W, de Swiet M, Padfield PL, Altman DG, Bland M, Coats A, Atkins N. The British Hypertension Society protocol for the evaluation of blood pressure measuring devices. *J Hypertension*. 1993;**11** (Suppl 2):S43–S62.
- 5 Centers for Disease Control and Prevention (CDC). National Center for Health Statistics (NCHS). National Health and Nutrition Survey Data. Hyattsville, MD: U.S. Department of Health and Human Services, Centers for Disease Control and Prevention, 2007–2012, <http://www.cdc.gov/nchs/nhanes.htm> (last accessed August 2014).
- 6 Kowal P, Chatterji S, Naidoo N, Biritwum R, Fan W, Lopez Ridaura R, Maximova T, Arokiasamy P, Phaswana-Mafuya N, Williams S, Snodgrass JJ, Minicuci N, D'Este C, Peltzer K, Boerma JT; SAGE Collaborators. Data resource profile: the World Health Organization Study on global AGEing and adult health (SAGE). *Int J Epidemiol*. 2012;**41**:1639–49.
- 7 Rubinstein AL, Irazola VE, Poggio R, Bazzano L, Calandrelli M, Lanús Zanetti FT, Manfredi JA, Olivera H, Seron P, Ponzo J, He J. Detection and follow-up of cardiovascular disease and risk factors in the Southern Cone of South America: the CESCAS I study. *BMJ Open* 2011;**1**:e000126.
- 8 The World Bank. Country and Lending Groups. <http://data.worldbank.org/about/country-and-lending-groups> (last accessed August 2014).
- 9 Rubin DR. (1987). *Multiple Imputation for Nonresponse in Surveys*. New York: John Wiley & Sons.
- 10 Saeed AA, Al-Hamdan NA, Bahnassy AA, Abdalla AM, Abbas MA, Abuzaid LZ. Prevalence, awareness, treatment, and control of hypertension among Saudi adult population: a national survey. *Int J Hypertens*. 2011;**2011**:174135.
- 11 Sy RG, Morales DD, Dans AL, Paz-Pacheco E, Punzalan FE, Abelardo NS, Duante CA. Prevalence of atherosclerosis-related risk factors and diseases in the Philippines. *J Epidemiol*. 2012;**22**:440–447.
- 12 Son PT, Quang NN, Viet NL, Khai PG, Wall S, Weinehall L, Bonita R, Byass P. Prevalence, awareness, treatment and control of hypertension in Vietnam – results for a national survey. *J Hum Hypertens*. 2012;**26**:268–80.

- 13 Disease Control Division (NCD). Malaysia NCD Surveillance 2006: NCD Risk Factors in Malaysia. Ministry of Health, Malaysia.
- 14 Li YC, Wang LM, Jiang Y, Li XY, Zhang M, Hu N. Prevalence of hypertension among Chinese adults in 2010. *Zhonghua Yu Fang Yi Xue Za Zhi*. 2012;46:409–13 (in Chinese).
- 15 Inskip H, Beral V, Fraser P, Haskey J. Methods for age-adjustment of rates. *Stat Med*. 1983;2:455-66.
- 16 United Nations, Department of Economic and Social Affairs. World population prospects: the 2012 revision. <http://esa.un.org/wpp/> (last accessed August 2014).
- 17 Burt VL, Cohen SB. A comparison of methods to approximate standard errors for complex survey data. *Rev Public Data Use*. 1984;12:159-63.
- 18 Australian Bureau of Statistics. Australian Health Survey 2011-2013 (AHS), <http://www.abs.gov.au/australianhealthsurvey> (last accessed August 2014)
- 19 Wilkins K, Campbell NR, Joffres MR, McAlister FA, Nichol M, Quach S, Johansen HL, Tremblay MS. Blood pressure in Canadian adults. Statistics Canada, Catalogue no. 82-003-XPE. *Health Reports*. 2010;21:37–46.
- 20 Statistics Canada. Blood pressure of Canadian adults, 2009 to 2011. Ministry of Industry 2012. Report No:82-635-x.
- 21 Ministry of Health, Santiago, Chile. National Health Survey Chile 2009-2010. (Last accessed August 2014 at <http://epi.minsal.cl/estudios-y-encuestas-poblacionales/encuestas-poblacionales/encuesta-nacional-de-salud/>) (in Spanish).
- 22 Cífková R, Škodová Z, Bruthans J, Holub J, Adámková V, Jozífová N, Galovcová M, Wohlfahrt P, Krajčoviechová A, Petržílková Z, Lánská V. Longitudinal trends in cardiovascular mortality and blood pressure levels, prevalence, awareness, treatment, and control of hypertension in the Czech population from 1985 to 2007/2008. *J Hypertens*. 2010;28:2196–2203.
- 23 Kastarinen M, Antikainen R, Peltonen M, Laatikainen T, Barengo NC, Jula A, Salomaa V, Jousilahti P, Nissinen A, Vartiainen E, Tuomilehto J. Prevalence, awareness and treatment of hypertension in Finland during 1982-2007. *J Hypertens*. 2009;27:1552–59.
- 24 Godet-Mardirossian H, Girerd X, Vernay M, Chamontin B, Castetbon, de Peretti C. Patterns of hypertension management in France (ENNS 2006-2007). *Eur J Prev Cardiol*. 2012;19:213–220.
- 25 Neuhauser H, Thamm M, Ellert U. Blood pressure in Germany 2008-2011: results of the German Health Interview and Examination Survey for Adults (DEGS1). *Bundesgesundheitsblatt Gesundheitsforschung Gesundheitsschutz*. 2013;56:795–801.
- 26 Barron S, Balanda K, Hughes J, Fahy L. National and subnational hypertension prevalence estimates for the Republic of Ireland: better outcome and risk factor data are needed to produce better prevalence estimates. *BMC Public Health*. 2014;14:24.

- 27 Morgan K, McGee H, Watson D, Perry I, Barry M. SLAN 2007: Survey of Lifestyle, Attitude and Nutrition in Ireland: Main Report. Dublin: Department of Health and Children; 2008.
- 28 Biino G, Parati G, Pina Concas M, Adamo M, Angius A, Vaccargiu S, Pirastu M. Environmental and genetic contribution to hypertension prevalence: data from an epidemiological survey on Sardinian genetic isolates. *PLoS ONE*. 2013;8:e59612.
- 29 Miura K, Nagai M, Ohkubo T. Epidemiology of hypertension in Japan. *Circ J*. 2013;77:2226–31.
- 30 Korea Centers for Disease Control and Prevention. National Health Statistics 2011, National Health and Nutrition Survey. Chungcheongbuk-do, Korea: Department of Health and Human Services and Health Policy (in Korean).
- 31 Ērglis A, Dzērve V, Pahomova-Strautina J, Narbutė I, Jēgere S, Mintāle I, Ligere R, Apinis P, Lejnīeks A, Misiņa D, Rozenbergs A. A population-based cross-sectional study of cardiovascular risk factor in Latvia. *Medicina (Kaunas)*. 2012;48:310–16.
- 32 Alkerwi A, Sauvageot N, Donneau AF, Lair ML, Couffignal S, Beissel J, Delagardelle C, Wagener Y, Albert A, Guillaume M. First nationwide survey on cardiovascular risk factors in Grand-Duchy of Luxembourg (ORISCAV-LUX). *BMC Public Health*. 2010;10:468.
- 33 Alkerwi A, Pagny S, Lair ML, Delagardelle C, Beissel J. Level of unawareness and management of diabetes, hypertension, and dyslipidemia among adults in Luxembourg: findings from ORISCAV-LUX study. *PLoS One*. 2013;8:e57920.
- 34 McLean RM, Williams S, Mann JI, Miller JC, Parnell WR. Blood pressure and hypertension in New Zealand: results from the 2008/09 Adult Nutrition Survey. *N Z Med J*. 2013;126:66–79.
- 35 Allende-Vigo MZ, Perez CM, Hernandez JJ, Torres CR, Valle Y, Rosario R, Suarez E. Unequal burden of diabetes and hypertension in the adult population of the San Juan metropolitan area of Puerto Rico. *J Diabetes Metab*. 2013;4:261.
- 36 Haj Bakri A, Al-Thani A. Qatar STEPS report 2012: chronic disease risk factor surveillance. Qatar: The Supreme Council of Health; 2013.
- 37 Epidemiology and Disease Control Division, Ministry of Health, Singapore. National health survey 2010 Singapore. Singapore, Republic of Singapore: Ministry of Health; 2010.
- 38 Banegas JR, Graciani A, de la Cruz-Troca JJ, León-Muñoz LM, Guallar-Castillón P, Coca A, Ruilope LM, Rodríguez-Artalejo F. Achievement of cardiometabolic goals in aware hypertensive patients in Spain: a nationwide population-based study. *Hypertension*. 2012;60:898–905.
- 39 Eriksson M, Holmgren L, Janlert U, Jansson JH, Lundblad D, Stegmayr B, Söderberg S, Eliasson M. Large improvements in major cardiovascular risk factors in the population of northern Sweden: the MONICA study 1986-2009. *J Intern Med*. 2010;269:219–231.

- 40 Danon-Hersch N, Marques-Vidal P, Bovet P, Chiolero A, Paccaud F, Pécoud A, Hayoz D, Mooser V, Waeber G, Vollenweider P. Prevalence, awareness, treatment and control of high blood pressure in a Swiss city general population: the CoLaus study. *Eur J Cardiovasc Prev Rehabil.* 2009;16:66–72.
- 41 Knott C, Mindell J. *Health Survey for England - 2011: Chapter 3, Hypertension.* Leeds, UK: Health and Social Care Information Centre, 2012.
- 42 Rutherford L, Sharp C, Bromley, C. for the Scottish Health Survey Team. *The Scottish Health Survey 2011, Volume 1: Adults.* Edinburgh: The Scottish Government; 2012.
- 43 National Public Health Institute, Ministry of Health. *Mongolian STEPS survey on the prevalence of noncommunicable disease and injury risk factors - 2009.* Manila, Philippines: World Health Organization, 2010.
- 44 Aekplakorn W, Sangthong R, Kessomboon P, Putwatana P, Inthawong R, Taneepanichskul S, Sritara P, Sangwatanaroj S, Chariyalertsak S; National Health Examination Survey IV study group. Changes in prevalence, awareness, treatment and control of hypertension in Thai population, 2004-2009: Thai National Health Examination Survey III-IV. *J Hypertens.* 2012;30:1734–42.
- 45 Harhay MO, Harhay JS, Nair MM. Education, household wealth and blood pressure in Albania, Armenia, Azerbaijan and Ukraine: findings from the demographic health surveys, 2005-2009. *Eur J Intern Med.* 2013;24:117–126.
- 46 Institute of Statistics, Institute of Public Health [Albania] and ICF Macro. 2010. *Albania demographic and health survey 2008-09.* Tirana, Albania: Institute of Statistics, Institute of Public Health and ICF Macro.
- 47 National Statistical Service [Armenia], Ministry of Health [Armenia], and ORC Macro. 2006. *Armenia demographic and health survey 2005.* Calverton, Maryland: National Statistical Service, Ministry of Health, and ORC Macro.
- 48 State Statistical Committee (SSC) [Azerbaijan] and Macro International Inc. 2008. *Azerbaijan demographic and health survey 2006.* Calverton, Maryland, USA: State Statistical Committee and Marco International Inc.
- 49 Pilav A, Doder V, Branković S. Awareness, treatment, and control of hypertension among adult population in the Federation of Bosnia and Herzegovina over the past decade. *J Public Health Res.* 2014;3:323.
- 50 Dorobanțu M, Bartoș D, Apetrei E, Arsenescu-Georgescu C, Pop D, Ghiorghe S, Tanasescu R, Craiu E, Manitiu I, Tautu O. Hypertension in Romania: where are we and what can we do? results from SEPHAR II study. *Romanian Journal of Cardiology.* 2012;22:285–92.
- 51 Vera G, Natasa D, Svetlana K, Sonja S, Jasmina G, Sonja T. Epidemiology of hypertension in Serbia: results of a national survey. *J Epidemiol.* 2012;22:261–266.
- 52 Altun B, Süleymanlar G, Utaş C, Arinsoy T, Ateş K, Ecdar T, Camsarı T, Serdengeçti K. Prevalence, awareness, treatment and control of hypertension in adults with chronic

- kidney disease in Turkey: results from the CREDIT study. *Kidney Blood Press Res.* 2012;36:36–46.
- 53 Ukrainian Center for Social Reforms (UCSR), State Statistical Committee (SSC) [Ukraine], Ministry of Health (MOH) [Ukraine], and Macro International Inc. *Ukraine demographic and health survey 2007*. Calverton, Maryland, USA: UCSR and Macro International.
- 54 Longo GZ, Neves Jd, Luciano VM, Peres MA. Prevalence of high blood pressure levels and associated factors among adults in Southern Brazil. *Arq Bras Cardiol.* 2009;93:360–366.
- 55 Rosário TM, Scala LC, França GV, Pereira MR, Jardim PC. Prevalence, control and treatment of arterial hypertension in Nobres – MT. *Arq Bras Cardiol.* 2009;93:622–628.
- 56 Cipullo JP, Martin JF, Ciorlia LA, Godoy MR, Cação JC, Loureiro AA, Cesarino CB, Carvalho AC, Cordeiro JA, Burdmann Ede A. Hypertension prevalence and risk factors in a Brazilian urban population. *Arq Bras Cardiol.* 2010;94:488–494.
- 57 Lyra R, Silva RS, Montenegro RM Jr, Matos MV, César NJ, Fernandes VO, Maurício-da-Silva L. High prevalence of arterial hypertension in a Brazilian northeast population of low education and income level, and its association with obesity and metabolic syndrome. *Rev Assoc Med Bras.* 2012;58:209–214.
- 58 Ordúñez P, Kaufman JS, Benet M, Morejon A, Silva LC, Shoham DA, Cooper RS. Blacks and whites in Cuba have equal prevalence of hypertension: confirmation from a new population survey. *BMC Public Health.* 2013;13:169.
- 59 Bansilal S, Vedanthan R, Woodward M, Iyengar R, Hunn M, Lewis M, Francis L, Charney A, Graves C, Farkouh ME, Fuster V. Cardiovascular risk surveillance to develop a nationwide health promotion strategy: the Grenada Heart Project. *Global Heart.* 2012;7:87–94.
- 60 Wilks R, Younger N, Tulloch-Reid M, McFarlane S, Francis D, for the Jamaica Health and Lifestyle Survey Research Group. *Jamaica health and lifestyle survey 2007-8: technical report*. Kingston, Jamaica: Tropical Medicine Research Institute, University of the West Indies; 2008.
- 61 Tulloch-Reid MK, Younger NO, Ferguson TS, Francis DK, Abdulkadri AO, Gordon-Strachan GM, McFarlane SR, Cunningham-Myrie CA, Wilks RJ, Anderson SG. Excess cardiovascular risk burden in Jamaican women does not influence predicted 10-year CVD risk profiles of Jamaica adults: an analysis of the 2007/08 Jamaica Health and Lifestyle Survey. *PLoS One.* 2013 Jun 21;8:e66625.
- 62 Mc Donald Posso AJ, Motta Borrel JA, Fontes F, Cruz Gonzalez CE, Pachón Burgos AA, Cumbreira Ortega A. High blood pressure in Panama: prevalence, sociodemographic and biologic profile, treatment, and control (STROBE). *Medicine.* 2014;93:e101.
- 63 Medina-Lezama J, Zea-Diaz H, Morey-Vargas OL, Bolaños-Salazar JF, Postigo-Macdonwall M, Paredes-Díaz S, Corrales-Medina F, Valdivia-Ascuña Z, Cuba-Bustinza C, Villalobos-Tapia P, Muñoz-Atahualpa E, Chirinos-Pacheco J, Raij L, Chirinos JA.

- Prevalence and patterns of hypertension in Peruvian Andean Hispanics: the PREVENCIÓN study. *J Am Soc Hypertens.* 2007;1:216–225.
- 64 Hamida F, Atif ML, Temmar M, Chibane A, Bezzaoucha A, Bouafia MT. Prevalence of hypertension in El-Menia oasis, Algeria, and metabolic characteristics in population. *Ann Cardiol Angeiol (Paris).* 2013;62:172–178 (in French).
- 65 El-Zanaty F, Way A. Egypt demographic and health survey 2008. Cairo, Egypt: Ministry of Health, El-Zanaty and Associates, and Macro International.
- 66 Esteghamati A, Abbasi M, Alikhani S, Gouya MM, Delavari A, Shishehbor MH, Forouzanfar M, Hodjatzadeh A, Ramezani RD. Prevalence, awareness, treatment, and risk factors associated with hypertension in the Iranian population: the National Survey of Risk Factors for Noncommunicable Diseases of Iran. *Am J Hypertens.* 2008;21:620–626.
- 67 Jaddou HY, Batiha AM, Khader YS, Kanaan AH, El-Khateeb MS, Ajlouni KM. Hypertension prevalence, awareness, treatment and control, and associated factors: results from a national survey, Jordan. *Int J Hypertens.* 2011;2011:828797.
- 68 Ben Romdhane H, Ben Ali S, Skhiri H, Traissac P, Bougatef S, Maire B, Delpeuch F, Achour N. Hypertension among Tunisian adults: results of the TAHINA project. *Hypertens Res.* 2012;35:341–347.
- 69 Modesti PA, Bamoshmoosh M, Rapi S, Massetti L, Al-Hidabi D, Al Goshae H. Epidemiology of hypertension in Yemen: effects of urbanization and geographical area. *Hypertens Res.* 2013;36:711–17.
- 70 Bangladesh Society of Medicine, Directorate General of Health Services, Ministry of Health and Family Welfare. Non-communicable disease risk factor survey Bangladesh 2010. Bangladesh: World Health Organization Country Office of Bangladesh 2011.
- 71 Bhagyalaxmi A, Atul T, Shikha J. Prevalence of risk factors of non-communicable diseases in a district of Gujarat, India. *J Health Popul Nutr.* 2013;31:78–85.
- 72 Gupta R, Pandey RM, Misra A, Agrawal A, Misra P, Dey S, Rao S, Menon VU, Kamalamma N, Vasantha Devi KP, Revathi K, Vikram NK, Sharma V, Guptha S. High prevalence and low awareness, treatment and control of hypertension in Asian Indian women. *J Hum Hypertens.* 2012;26:585–93.
- 73 Jonas JB, Nangia V, Matin A, Joshi PP, Ughade SN. Prevalence, awareness, control, and associations of arterial hypertension in a rural central India population: the Central India Eye and Medical study. *Am J Hypertens.* 2010;23:347–50.
- 74 Thrift AG, Evans RG, Kalyanram K, Kartik K, Fitzgerald SM, Srikanth V. Gender-specific effects of caste and salt on hypertension in poverty: a population-based study. *J Hypertens.* 2011;29:443–50.
- 75 Pires JE, Sebastiao YV, Langa AJ, Nery SV. Hypertension in Northern Angola: prevalence, associated factors, awareness, treatment and control. *BMC Public Health.* 2013;13:90.



- 76 Doulougou B, Kouanda S, Bado A, Nikièma L, Zunzunegui MV. Hypertension in the adult population of Kaya Health and Demographic Surveillance System in Burkina Faso: prevalence and associated factors. *Int J Trop Dis Health*. 2014;4:94–110.
- 77 Kufe CN, Klipstein-Grobusch K, Leopold F, Assah F, Hgufor G, Mbeh G, Mbanya VN, Njanya JC. Risk factors of impaired fasting glucose and type 2 diabetes in Yaoundé, Cameroon: a cross sectional study. *BMC Public Health*. 2015;15:59.
- 78 Longo-Mbenza B, Ngoma DV, Nahimana D, Mayuku DM, Fuele SM, Ekwanzala F, Beya C. Screen detection and the WHO stepwise approach to the prevalence and risk factors of arterial hypertension in Kinshasa. *Eur J Cardiovasc Prev Rehabil*. 2008;15:503–508.
- 79 Tesfaye F, Byass P, Wall S. Population based prevalence of high blood pressure among adults in Addis Ababa: uncovering a silent epidemic. *BMC Cardiovasc Disord*. 2009;9:39.
- 80 Mengistu MD. Pattern of blood pressure distribution and prevalence of hypertension and prehypertension among adults in Northern Ethiopia: disclosing the hidden burden. *BMC Cardiovasc Disord*. 2014;14:33.
- 81 Jenson A, Omar AL, Omar MA, Rishad AS, Khoshnood K. Assessment of hypertension control in a district of Mombasa, Kenya. *Glob Public Health*. 2011;6:293–306.
- 82 Ministry of Health and Social Welfare (MOHSW) [Lesotho] and ICF Macro. 2010. Lesotho demographic and health survey. Maseru, Lesotho: MOHSW and ICF Macro.
- 83 Damasceno A, Azevedo A, Silva-Matos C, Prista A, Diogo D, Lunet N. Hypertension prevalence, awareness, treatment, and control in Mozambique: urban/rural gap during epidemiological transition. *Hypertension*. 2009;54:77–83.
- 84 Adedoyin RA, Mbada CE, Balogun MO, Martins T, Adebayo RA, Akintomide A, Akinwusi PO. Prevalence and pattern of hypertension in a semiurban community in Nigeria. *Eur J Cardiovasc Prev Rehabil*. 2008;15:683–687.
- 85 Macia E, Duboz P, Gueye L. Prevalence, awareness, treatment and control of hypertension among adults 50 years and older in Dakar, Senegal. *Cardiovasc J Afr*. 2012;23:265–269.
- 86 Wamala JF, Karyabakabo Z, Ndungutse D, Guwatudde D. Prevalence factors associated with hypertension in Rukungiri District, Uganda - a community-based study. *Afr Health Sci*. 2009;9:153–160.
- 87 Mulenga D, Siziya S, Rudatsikira E, Mukonka VM, Babaniyi O, Songolo P, Muula AS. District specific correlates for hypertension in Kaoma and Kasama rural districts of Zambia. *Rural Remote Health*. 2013;13:2345.
- 88 Dunstan D, Zimmet P, Welborn T, Sicree R, Armstrong T, Atkins R, Cameron A, Shaw J, Chadban S. Diabesity and associated disorders in Australia – 2000: the accelerating epidemic. The Australian Diabetes, Obesity and Lifestyle Study (AusDiab). Melbourne Australia: International Diabetes Institute, 2001.



- 89 Dunstan DW, Zimmet PZ, Welborn TA, Cameron AJ, Shaw J, de Courten M, Jolley D, McCarty DJ; Australian Diabetes, Obesity and Lifestyle Study (AusDiab). The Australian Diabetes, Obesity and Lifestyle Study (AusDiab) – methods and response rates. *Diabetes Res Clin Pract.* 2002;57:119–29.
- 90 Hernandez-Hernandez R, Silva H, Velasco M, Pellegrini F, Macchia A, Escobedo J, Vinueza R, Schargrotsky H, Champagne B, Pramparo P, Wilson E; CARMELA Study Investigators. Hypertension in seven Latin American cities: the Cardiovascular Risk Factor Multiple Evaluation in Latin America (CARMELA) study. *J Hypertens.* 2010;28:24–34.
- 91 Silva H, Hernandez-Hernandez R, Vinueza R, Velasco M, Biossonnet CP, Escobedo J, Silva HE, Pramparo P, Wilson E; CARMELA Study Investigators. Cardiovascular risk awareness, treatment, and control in urban Latin America. *Am J Ther.* 2010;17:159–66.
- 92 Cífková R, Škodová Z, Lánská V, Adámková V, Novozámská E, Jozífová M, Plásková M, Hejl Z, Petržílková Z, Galovcová M, Palous D. Prevalence, awareness, treatment, and control of hypertension in the Czech Republic. Results of two nationwide cross-sectional surveys in 1997/1998 and 2000/2001, Czech Post-MONICA study. *J Hum Hypertens.* 2004;18:571–9.
- 93 Abina J, Volozh O, Solodkaya E, Saava M. Blood pressure and contributing factors in inhabitants of Estonia: 15-year trends. *Blood Pressure.* 2003;12:111–21.
- 94 Kastarinen MJ, Antikainen RL, Laatikainen TK, Salomaa VV, Tuomilehto JO, Nissinen AM, Vartiainen EA. Trends in hypertension care in eastern and south-western Finland during 1982-2002. *J Hypertens.* 2006;24:829–36.
- 95 Thamm M. Blood pressure in Germany: current status and trends. *Gesundheitswesen.* 1999;61 Spec No: S90–93.
- 96 Stergiou GS, Thomopoulou GC, Skeva II, Mountokalakis TD. Prevalence, awareness, treatment, and control of hypertension in Greece: the Didima study. *Am J Hypertens.* 1999;12:959–65.
- 97 Ho SC, Chen YM, Woo JLF, Leung SSF, Lam TH, Janus ED. Association between simple anthropometric indices and cardiovascular risk factors. *Int J Obesity.* 2001;25:1689–97.
- 98 Giampaoli S, Palmieri L, Dima F, Pilotto L, Vescio MF, Vanuzzo D. Socioeconomic aspects and cardiovascular risk factors: experience at the Cardiovascular Epidemiologic Observatory. *Ital Heart J.* 2001;2:294–302.
- 99 Choi KM, Park HS, Han JH, Lee JS, Lee J, Ryu OH, Lee KW, Cho KH, Yoon D, Baik SH, Choi DS, Kim SM. Prevalence of prehypertension and hypertension in a Korean population: Korean National Health and Nutrition Survey 2001. *J Hypertens.* 2006;24:1515–21.
- 100 Getz L, Kirkengen AL, Hetlevik I, Romundstad S, Sigurdsson JA. Ethical dilemmas arising from implementation of the European guidelines on cardiovascular disease prevention in clinical practice: a descriptive epidemiological study. *Scand J Prim Health Care.* 2004;22:202-08.

- 101 Al-Riyami AA, Afifi M. Hypertension in Oman: distribution and correlates. *J Egypt Public Health Assoc.* 2002;77:383–407.
- 102 Zdrojewski T, Wyrzykowski B, Szczech R, Wierucki L, Naruszewicz M, Narkiewicz K, Zarzeczna-Baran M; Steering Committees of the Programmes NATPOL PLUS; SMS; Polish 400-Cities Project. Epidemiology and prevention of arterial hypertension in Poland. *Blood Press.* 2005;14 (Suppl 2):10–16.
- 103 Macedo ME, Lima MJ, Silva AO, Alcantara P, Ramalhinho V, Carmona J. Prevalence, awareness, treatment and control of hypertension in Portugal: the PAP study. *J Hypertens.* 2005;23:1661–66.
- 104 Berg CM, Lissner L, Aires N, Lappas G, Torén K, Wilhelmsen L, Rosengren A, Thelle DS. Trends in blood lipid levels, blood pressure, alcohol and smoking habits from 1985 to 2002: results from INTERGENE and GOT-MONICA. *Eur J Cardiovasc Prev Rehabil.* 2005;12:115–125.
- 105 Su TC, Bai CH, Chang HY, You SL, Chien KL, Chen MF, Chen HJ, Pan WH, Tseng CH, Cheng SH, Hurng BS, Hwang LC, Chen CJ. Evidence for improved control of hypertension in Taiwan: 1993-2002. *J Hypertens.* 2008;26:600–6.
- 106 Gulliford MC, Mahabir D, Rocke B. Socioeconomic inequality in blood pressure and its determinants: cross-sectional data from Trinidad and Tobago. *J Hum Hypertens.* 2004;18:61–70.
- 107 Primates P, Brookes M, Poulter NR. Improved hypertension management and control: results from the Health Survey for England 1998. *Hypertension.* 2001;38:827–32.
- 108 Centers for Disease Control and Prevention (CDC). National Center for Health Statistics (NCHS). National Health and Nutrition Examination Survey Data. Hyattsville, MD: U.S. Department of Health and Human Services, Centers for Disease Control and Prevention, 1999-2000. (Last accessed August 2014 at <http://www.cdc.gov/nchs/nhanes.htm>)
- 109 King H, Keuky L, Seng S, Khun T, Roglic G, Pinget M. Diabetes and associated disorders in Cambodia: two epidemiological surveys. *Lancet.* 2005;366:1633–39.
- 110 Wu Y, Huxley R, Li L, Anna V, Xie G, Yao C, Woodward M, Li X, Chalmers J, Gao R, Kong L, Yang X; China NNHS Steering Committee; China NNHS Working Group. Prevalence, awareness, treatment, and control of hypertension in China: data from the China National Nutrition and Health Survey 2002. *Circulation.* 2008;118:2679–86.
- 111 Wu XG, Duan XF. Epidemiology of Hypertension. In: Li LM, eds. *The 2002 China National Nutrition and Health Survey Report. Series 4: Hypertension.* Beijing: People's Health Press. 2008:23-36.
- 112 Ng N, Stenlund H, Bonita R, Hakimi M, Wall S, Weinehall L. Preventable risk factors for noncommunicable diseases in rural Indonesia: prevalence study using WHO STEPS approach. *Bull World Health Organ.* 2006;84:305–13.
- 113 Rampal L, Rampal S, Azhar MZ, Rahman AR. Prevalence, awareness, treatment and control of hypertension in Malaysia: a national study of 16,440 subjects. *Public Health.* 2008;122:11–18.

- 114 InterASIA Collaborative group. Cardiovascular risk factor levels in urban and rural Thailand: the International Collaborative Study of Cardiovascular Disease in Asia (InterASIA). *Eur J Cardiovasc Prev Rehabil.* 2003;10:249–57.
- 115 Pilav A, Nissinen A, Haukkala A, Nikšić D, Laatikainen T. Cardiovascular risk factors in the Federation of Bosnia and Herzegovina. *Eur J Public Health.* 2007;17:75–79.
- 116 Jenei Z, Páll D, Katona É, Kakuk G, Polgár P. The epidemiology of hypertension and its associated risk factors in the city of Debrecen, Hungary. *Public Health.* 2002;116:138–44.
- 117 Altun B, Arici M, Nergizoglu G, Derici U, Karatan O, Turgan C, Sindel S, Erbay B, Hasanoğlu E, Çağlar S; Turkish Society of Hypertension and Renal Diseases. Prevalence, awareness, treatment and control of hypertension in Turkey (the PatenT study) in 2003. *J Hypertens.* 2005;23:1817–23.
- 118 Lessa Í, Magalhães L, Araújo MJ, de Almeida Filho N, Aquino E, Oliveira MM. Arterial hypertension in the adult population of Salvador (SA) – Brazil. *Arq Bras Cardiol.* 2006;87:683–92.
- 119 Mill JG, Molina MC, Silva IO, Marquezini AJ, Ferreira AVL, Cunha RS, Herkenhoff FL. Epidemiologia da hipertensão arterial na cidade de Vitória, Espírito Santo. *Hipertensão.* 2004;7:109–16.
- 120 Ala L, Gill G, Gurgel R, Cuevas L. Evidence for affluence-related hypertension in urban Brazil. *J Hum Hypertens.* 2004;18:775–79.
- 121 Castro RA, Moncau JE, Marcopito LF. Hypertension prevalence in the city of Formiga, MG (Brazil). *Arq Bras Cardiol.* 2007;88:334–39.
- 122 Hartmann M, Dias-da-Costa JS, Anselmo Olinto MT, Pattussi MP, Tramontini A. Prevalence of systemic hypertension and associated factors: a population-based study among women in the south of Brazil. *Cad Saude Publica.* 2007;23:1857–66 (in Portuguese).
- 123 Ordunez P, Barcelo A, Bernal JL, Espinosa A, Silva LC, Cooper RS. Risk factors associated with uncontrolled hypertension: findings from the baseline CARMEN survey in Cienfuegos, Cuba. *J Hypertens.* 2008;26:663–71.
- 124 Jean-Baptiste ED, Larco P, Charles-Larco N, Vilgrain C, Simon D, Charles R. Glucose intolerance and other cardiovascular risk factors in Haiti (PREDIAH). *Diabetes Metab.* 2006;32:443–51.
- 125 Sulbaran T, Silva E, Calmon G, Vegas A. Epidemiologic aspects of arterial hypertension in Maracaibo, Venezuela. *J Hum Hypertens.* 2000;14:S6–S9.
- 126 Tazi MA, Abir-Khalil S, Lahmouz F, Arrach ML, Chaouki N. Risk factors for hypertension among the adult Moroccan population. *East Mediterr Health J.* 2009;15:827–41.
- 127 Malhotra P, Kumari S, Kumar R, Jain S, Sharma BK. Prevalence and determinants of hypertension in an un-industrialized rural population of North India. *J Hum Hypertens.* 1999;13:467–72.

- 128 Singh RB, Beegom R, Ghosh S, Niaz MA, Rastogi V, Rastogi SS, Singh NK, Nangia S. Epidemiological study of hypertension and its determinants in an urban population of North India. *J Hum Hypertens*. 1997;11:679–85.
- 129 Singh RB, Sharma JP, Rastogi V, Niaz MA, Singh NK. Prevalence and determinants of hypertension in the Indian social class and heart survey. *J Hum Hypertens*. 1997;11:51–56.
- 130 Mohan V, Deepa M, Farooq S, Datta M, Deepa R. Prevalence, awareness and control of hypertension in Chennai – the Chennai Urban Rural Epidemiology study (CURES – 52). *J Assoc Physician I*. 2007;55:326–32.
- 131 Thankappan KR, Sivasankaran S, Sarma PS, Mini G, Khader SA, Padmanabhan P, Vasana R. Prevalence, correlates, awareness, treatment, and control of hypertension in Kumarakom, Kerala: baseline results of a community-based intervention program. *Indian Heart J*. 2006;58:28–33.
- 132 Niakara A, Fournet F, Gary J, Harang M, Nébié LV, Salem G. Hypertension, urbanization, social and spatial disparities: a cross-sectional population-based survey in a West African urban environment (Ouagadougou, Burkina Faso). *Trans R Soc Trop Med Hyg*. 2007;101:1136–42.
- 133 Kamadjeu RM, Edwards R, Atanga JS, Unwin N, Kiawi EC, Mbanya JC. Prevalence, awareness and management of hypertension in Cameroon: findings of the 2003 Cameroon Burden of Diabetes Baseline Survey. *J Hum Hypertens*. 2006;20:91–92.
- 134 Mbanya JC, Minkoulou EM, Salah JN, Balkau B. The prevalence of hypertension in rural and urban Cameroon. *Int J Epidemiol*. 1998;27:181–85.
- 135 Cooper R, Rotimi C, Ataman S, McGee D, Osotimehin B, Kadiri S, Muna W, Kinque S, Fraser H, Forrester T, Bennett F, Wilks R. The prevalence of hypertension in seven populations of West African origin. *Am J Public Health*. 1997;87:160–68.
- 136 Mufunda J, Mebrahtu G, Usman A, Nyarango P, Kosia A, Ghebrat Y, Ogbamariam A, Masjuan M, Gebremichael A. The prevalence of hypertension and its relationship with obesity: results from a national blood pressure survey in Eritrea. *J Hum Hypertens*. 2006;20:59–65.
- 137 Tesfaye F, Nawi NG, Van Minh H, Byass P, Berhane Y, Bonita R, Wall S. Association between body mass index and blood pressure across three populations in Africa and Asia. *J Hum Hypertens*. 2007;21:28–37.
- 138 Danon-Hersch N, Chiolerio A, Shamlaye C, Paccaud F, Bovet P. Decreasing association between body mass index and blood pressure over time. *Epidemiology*. 2007;18:493–500.
- 139 Steyn K, Gaziano TA, Bradshaw D, Laubscher R, Fourie J. South African Demographic and Health Coordinating Team. Hypertension in South African Adults: results from the Demographic and Health Survey, 1998. *J Hypertens*. 2001;19:1717–25.

- 140 Edwards R, Unwin N, Mugusi F, Whiting D, Rashid S, Kissima J, Aspray TJ, Alberti KG. Hypertension prevalence and care in an urban and rural area of Tanzania. *J Hypertens.* 2000;18:145–52.
- 141 Mufunda J, Scott LJ, Chifamba J, Matenga J, Sparks B, Cooper R, Sparks H. Correlates of blood pressure in an urban Zimbabwean population and comparison to other populations of African origin. *J Human Hypertens.* 2000;14:65–73.
